1 **STAT pathway activation limits the Ascl1-mediated chromatin remodeling required for**  
2 **neural regeneration from Müller glia in adult mouse retina.**

3  
4 Nikolas L. Jorstad<sup>1,2\*</sup>, Matthew S. Wilken<sup>1,3\*</sup>, Levi Todd<sup>1</sup>, Paul Nakamura<sup>1</sup>, Nick Radulovich<sup>1</sup>,  
5 Marcus J. Hooper<sup>1</sup>, Alex Chitsazan<sup>1</sup>, Brent A. Wilkerson<sup>1</sup>, Fred Rieke<sup>4</sup>, and Thomas A. Reh<sup>1\*\*</sup>  
6

7 **Abstract:**

8  
9 Müller glia can serve as a source for retinal regeneration in some non-mammalian  
10 vertebrates. Recently we found that this process can be induced in mouse Müller glia after  
11 injury, by combining transgenic expression of the proneural transcription factor Ascl1 and the  
12 HDAC inhibitor TSA. However, new neurons are only generated from a subset of Müller glia in  
13 this model, and identifying factors that limit Ascl1-mediated MG reprogramming could potentially  
14 make this process more efficient, and potentially useful clinically. One factor that limits  
15 neurogenesis in some non-mammalian vertebrates is the STAT pathway activation that occurs  
16 in Müller glia in response to injury. In this report, we tested whether injury induced STAT  
17 activation hampers the ability of Ascl1 to reprogram Müller glia into retinal neurons. Using a  
18 STAT inhibitor, in combination with our previously described reprogramming paradigm, we  
19 found a large increase in the ability of Müller glia to generate neurons, similar to those we  
20 described previously. Single-cell RNA-seq showed that the progenitor-like cells derived from  
21 Ascl1-expressing Müller glia have a higher level of STAT signaling than those that become  
22 neurons. Using Ascl1 ChIP-seq and DNase-seq, we found that developmentally inappropriate  
23 Ascl1 binding sites (that were unique to the overexpression context) had enrichment for the  
24 STAT binding motif. This study provides evidence that STAT pathway activation reduces the  
25 efficiency of Ascl1-mediated reprogramming in Müller glia, potentially by directing Ascl1 to  
26 inappropriate targets.  
27  
28  
29

---

<sup>1</sup> Department of Biological Structure, University of Washington, Seattle, Washington 98195, USA.

<sup>2</sup> Department of Pathology, Molecular Medicine and Mechanisms of Disease Program, University of Washington, Seattle, Washington 98195, USA.

<sup>3</sup> Present address: Altius Institute for Biomedical Sciences, Seattle, Washington, USA

<sup>4</sup> Department of Physiology and Biophysics, University of Washington, Seattle, Washington 98195, USA

\* These authors contributed equally to this study

\*\* Corresponding author and Lead Contact. Correspondence: tomreh@uw.edu

30 **INTRODUCTION:**

31

32           Functional regeneration of retinal neurons occurs naturally in teleost fish and many  
33 amphibians<sup>1-6</sup>. In zebrafish, the Müller glia (MG) respond to a variety of injury models by  
34 generating cells that resemble multipotent progenitor cells found in the developing retina. These  
35 MG-derived progenitors have the capacity to produce all types of retinal neurons and restore  
36 visual function<sup>7</sup>. In amphibians and embryonic birds, the pigmented epithelial cells undergo a  
37 similar transition to retinal progenitor cells, and can regenerate a new, laminated retina<sup>8,9</sup>.

38           In adult birds and mammals, functional regeneration does not occur spontaneously after  
39 retinal injury. Neurotoxic damage to retinal neurons in newly hatched chicks causes the MG to  
40 undergo the initial stages of the process that occurs in fish, but few of the MG-derived  
41 progenitors go on to make neurons and it is not known whether the few regenerated MG-  
42 derived neurons can functionally integrate into the existing retinal circuitry<sup>1</sup>. Injury to the  
43 mammalian retina has been studied most extensively in rodents, and as in the bird, retinal injury  
44 does not initiate a spontaneous regenerative response<sup>10</sup>. Attempts to stimulate MG proliferation  
45 after injury by stimulating specific signaling pathways with growth factors and small molecules  
46 have led to some evidence for new neurogenesis<sup>11</sup>; however, none of these treatments have  
47 been sufficient to regenerate functional neurons from MG in mice<sup>12-14</sup>.

48           Recently, we have found that transgenic overexpression of the proneural bHLH *Ascl1*  
49 enables MG to generate functional neurons in mice. We found that in mice up to two weeks old,  
50 *Ascl1* alone can induce neurogenesis from MG after N-Methyl-D-aspartic acid (NMDA)  
51 excitotoxic damage<sup>15</sup>. More recently, we demonstrated that *Ascl1* and the HDAC inhibitor  
52 trichostatin A (TSA) were together sufficient to induce MG to regenerate functional neurons after  
53 retinal injury in adult mice<sup>16</sup>. While these studies were encouraging and demonstrated for the  
54 first time that new neurons generated in adult mice can be integrated into the mature retinal  
55 circuit, the majority of the MG in treated retinas did not undergo neurogenesis.

56 In the course of our analysis of single-cell RNA-seq data from the previous study, we  
57 noticed that those MG that failed to reprogram to neurons had a high level of STAT3 signaling.  
58 MG from fish, birds and mammals all respond to retinal damage by rapidly activating STAT3  
59 signaling<sup>17-20</sup>. In the mouse retina, STAT3 signaling in MG is associated with reactive “gliosis”;  
60 however, in the fish retina, STAT3 is required for damage-induced MG-mediated neuronal  
61 regeneration, and JAK/STAT activation is sufficient to induce retinal regeneration in the absence  
62 of injury<sup>17,21,22</sup>. In the chick retina, however, experiments have suggested that STAT signaling  
63 instead may limit regeneration: inhibition of STAT3 increases the neurogenesis from MG in  
64 damaged retinas<sup>20</sup>. Since an increase in STAT signaling is well known to occur in glia after  
65 neuronal injury, we tested whether the injury response was potentially reducing Ascl1-mediated  
66 reprogramming. We tested this hypothesis by inhibition of STAT signaling, and found that a  
67 STAT inhibitor, in combination with our previously described treatment paradigm, doubled the  
68 efficiency of neuron regeneration in vivo. Analysis of ChIP-seq data of Ascl1-expressing MG  
69 suggests that STAT signaling may act to redirect Ascl1 to inappropriate regulatory sites in the  
70 genome, and implicate the Id1 and Id3 inhibitors of bHLH factors in this process. Our results  
71 extend previous work in fish and birds on the importance of JAK/STAT signaling in retinal  
72 regeneration. Together with the results from the non-mammalian vertebrates, it appears that an  
73 initial activation of the STAT pathway may be necessary to start the regeneration process, but  
74 sustained activation of the pathway may then become limiting.

75

## 76 **RESULTS:**

77

### 78 *STAT pathway inhibition improves MG-derived neurogenesis in vivo*

79 To test whether the activation of the STAT pathway in MG reduces their ability to be  
80 effectively reprogrammed by Ascl1, we inhibited this pathway in an experimental system in  
81 which Ascl1 can be targeted specifically to MG. We previously described<sup>15,16</sup> a MG-specific

82 tamoxifen inducible mouse model of *Ascl1*-overexpression (*Glast*-CreER:*Rosa*-flox-stop-*LNL*-  
83 tTA:*tetO*-m*Ascl1*-ires-GFP). Adult mice received up to five consecutive daily intraperitoneal (IP)  
84 injections of tamoxifen (1) to induce *Ascl1* expression in the MG, followed by (2) an intravitreal  
85 injection of NMDA to induce degeneration of inner retinal neurons, and then (3) an intravitreal  
86 injection of either TSA or TSA and the potent STAT inhibitor, SH-4-54 (referred to as ANT and  
87 ANTSi treatment, henceforth) (Figure 1A). SH-4-54 successfully blocks the phosphorylation of  
88 STAT3's tyrosine 705 residue in *Ascl1*-overexpressing MG and was not found to be toxic at the  
89 concentrations used for this study (Figure S1). As previously described, ANT treatment resulted  
90 in GFP+ MG-derived neurons that expressed bipolar neuron genes *Otx2* and *Cabp5*, in addition  
91 to many MG that failed to undergo neurogenesis (Figure 1B). When the STAT pathway inhibitor  
92 was co-injected with the TSA (ANTSi treatment), there was a striking increase in the number of  
93 MG-derived neurons (Figure 1C, 1D). Quantification of the mature bipolar gene *Cabp5* revealed  
94 a more than two-fold increase in the number of MG-derived neurons ( $24 \pm 5\%$  and  $52 \pm 3\%$ ,  $n =$   
95 6 and  $n = 8$ , for ANT and ANTSi treatments, respectively; Figure 1E-F). All *Cabp5*+ GFP+ cells  
96 also expressed *Otx2* and all *Cabp5*+ cells had neuronal morphology; however, not all *Otx2*+  
97 cells expressed *Cabp5* or had neuronal morphology, as previously described<sup>16</sup>.

98 To determine whether the MG-derived neurons arise from mitotic proliferation or directly  
99 differentiate into neurons we intravitreally co-injected EdU with the NMDA on treatment day 8  
100 and also with the TSA and STATi on treatment day 10 (Figure 1G). Additionally, we performed  
101 twice daily IP injections of EdU from treatment day 9 through 12. After collecting the retinas on  
102 treatment day 26, we found that many of the MG and MG-derived neurons were labeled with  
103 EdU (Figure 1H). Additionally, most of the MG-derived neurons labeled with EdU, and *Cabp5*,  
104 and had neuronal morphology (Figure 1I, orange arrows). These results show that many of the  
105 new neurons regenerated in the ANTSi condition are the result of mitotic proliferation of the MG.  
106 We found that approximately 53% of GFP+ cells in the ANTSi condition were co-labeled with  
107 EdU.

108

109 *ANTSi treated MG-derived neurons make synaptic connections with existing circuitry*

110 In our previous study, we found that MG-derived neurons generated by ANT treatment  
111 express synaptic proteins, make connections with cone terminals, and successfully integrate  
112 into the existing retinal circuitry and functionally respond to light stimuli<sup>16</sup>. In this study, we found  
113 that similar to ANT-treated neurons, ANTSi-treated MG-derived neurons express synapse  
114 proteins Ctbp2 and Psd95. Labeling retinal sections from the ANTSi treatment group for cone  
115 blue opsin (Opn1sw) showed MG-derived neurons contacting cone photoreceptors terminals in  
116 the OPL, indicative of photoreceptor-bipolar network connections (Figure 2A-C).

117 To determine if ANTSi-treated MG-derived neurons express synaptic proteins in the  
118 correct cellular locations and form synaptic specializations with other cell types, we stained for  
119 Ctbp2 and Psd95 (Figure 2D-G). In the OPL, we found Psd95+ Ctbp2+ photoreceptor synapses  
120 onto MG-derived neuron processes, indicative of a photoreceptor-to-MG-derived neuron  
121 synaptic specialization. Interestingly, we also found these contacts in the ONL (Figure 2D-E)  
122 with photoreceptors synapsing onto the apical process of MG-derived neurons. This irregular  
123 location for photoreceptor synapse formation is likely due to the retraction of photoreceptor  
124 terminals<sup>23</sup>. In the IPL, we found Ctbp2 puncta within the MG-derived neuron terminals (Figure  
125 2F-G). Pre-synaptic Ctbp2 within the MG-derived neurons was directly apposed to Psd95 from  
126 post-synaptic cell partners, indicative of a MG-derived neuron output onto other neurons in the  
127 IPL (Figure 2G). Our data suggest that MG-derived neurons make synaptic specializations with  
128 photoreceptors in the OPL and post-synaptic cells in the IPL, consistent with our previous  
129 findings that MG-derived neurons are able to make synaptic connections within the existing  
130 retinal circuitry.

131 Next, we performed whole-cell electrophysiology recordings from GFP+ and GFP- cells  
132 to determine if ANTSi-treated MG-derived neurons have electrical properties consistent with

133 retinal neurons. We plotted the population data from recorded cells onto a plot of previously  
134 recorded ANT-treated cells from another study<sup>16</sup> (Figure 2H-I). We found that GFP+ cells had  
135 much higher input resistance ( $R_{in}$ ) than GFP- MG and the resting membrane potentials ( $V_{rest}$ ) of  
136 GFP+ cells were depolarized compared to the GFP- MG. Most GFP+ cells exhibited  $R_{in}$  and  $V_{rest}$   
137 properties similar to GFP- neurons (Figure 2I), suggesting that the GFP+ cells' electrical  
138 properties were indeed more similar to retinal neurons. To determine if GFP+ cells integrated  
139 into the retinal circuitry and received synaptic input from photoreceptors responding to light  
140 stimulus, we exposed dark adapted ANTSi-treated retinas to incremental increases of  
141 luminance and recorded from MG-derived neurons (Figure 2H). Similar to our previous study of  
142 ANT-treated MG-derived neurons<sup>16</sup>, we found examples of ANTSi-treated MG-derived neurons  
143 responding to light increments by rapidly depolarizing, as would be expected for ON-preferring  
144 retinal neurons. Light responses presented with amplitudes ~2 mV, which were not as robust as  
145 some of the cell recordings from our previous study; however, these recordings were performed  
146 on cells after 2, 5, and 7 weeks post-treatment, whereas our previous study included cells from  
147 later time points ranging from 4-15 weeks. Taken together, these findings indicate that MG-  
148 derived neurons in the ANTSi treatment condition have retinal neuron electrical properties and  
149 receive synaptic input from photoreceptors resulting in light-evoked visual responses.

150

#### 151 *Single-cell RNA-seq on reprogrammed Müller glia.*

152 To further characterize the effects of STAT inhibition during MG reprogramming, we ran  
153 single-cell RNA-seq (scRNA-seq) on FACS-purified MG and MG-derived cells 14 days after  
154 ANTSi treatment, similar to that described in an earlier study<sup>16</sup>. In total 648, 823, and 2283 cells  
155 were analyzed from WT, ANT, and ANTSi treatments, respectively. All three (WT, ANT, and  
156 ANTSi) datasets were combined, normalized, scaled and analyzed in R with Seurat and  
157 Monocle<sup>24-26</sup>. Projecting all three treatments onto a single tSNE plot shows ten distinct clusters

158 (Figure 3A), differentially associated with the different treatment conditions (Figure 3C). We  
159 identified the cell types comprising the clusters by their unique expression of specific known  
160 marker genes. Some of these genes are shown projected onto the individual clusters (Figure  
161 3B) and additional genes are shown associated with the clusters as a heatmap (Figure 3F). For  
162 example, Clusters 3 and 4 were comprised of cells almost exclusively from the untreated (WT)  
163 condition and expressed genes normally present in MG, such as *Glul* and *Aqp4*; these were  
164 classified as “MG” clusters (Figure 3D). Clusters 0 and 2 showed enrichment for progenitor  
165 genes (*Dll1*; Figure 3B) but lacked neuronal gene expression (*Otx2* and *Cabp5*) and showed  
166 reduced glial gene expression (*Glul*). We therefore classified clusters 0 and 2 as “Progenitor-  
167 like” cells. Clusters 1 and 6 showed enrichment for neuronal genes and greatly reduced  
168 expression of glial genes and were classified as “MG-derived Neurons”. In addition to these  
169 major clusters, there were two contaminating cell populations that we do not think were derived  
170 from MG. These include microglial cells, identified by their expression of *Aif1* (*IBA1*), and a  
171 small number of cells that express *Rho* and other photoreceptor genes that we consider  
172 contaminating “Rods”. These two populations are present in the FACS-purified cells regardless  
173 of treatment group, whereas the progenitor-like cells and MG-derived neurons are only present  
174 in the ANT and ANTSi conditions (Figure 3C-D). Clusters 8 and 9 contained a small number of  
175 cells and were not enriched for any particular retinal cell type (Figure 3D; “Other”).

176 The immunofluorescent analysis of retinas from the ANTSi condition indicated that a  
177 greater percentage of progenitor-like cells differentiate into neurons when compared with the  
178 ANT treatment. We analyzed the scRNA-seq results to determine whether a similar trend could  
179 be detected. Quantifying the number of WT, ANT, and ANTSi cells in the MG, progenitor-like,  
180 or MG-derived neuron clusters (Figure 3E) revealed nearly double the number of MG-derived  
181 neurons in the ANTSi treatment compared to ANT (29% of total ANTSi cells vs. 16% of total  
182 ANT cells). The increase in the MG-derived neuron population in the ANTSi treatment was  
183 accompanied by a decrease in the number of progenitor-like cells. These data support the

184 immunofluorescent analysis that STAT inhibition results in a population shift of MG from  
185 progenitor-like cells to MG-derived neurons and doubles reprogramming efficacy.

186 To better understand the trajectory of the reprogramming process, we used the Monocle  
187 analysis package on a subset of the data that only included MG, progenitor-like cells, and MG-  
188 derived neurons from clusters 0, 1, 2, 3, 4, and 6 (Figure 4A). We found the pseudotime scale  
189 tracked with our classified cell types, with MG being the root state and transitioning through the  
190 progenitor-like cell state and eventually progressing towards MG-derived neurons (Figure 4B).  
191 We observed cells decreasing expression of glial genes (e.g. Glul) as they progress towards  
192 progenitor-like cells and MG-derived neurons (Figures 4C-D). Cells in the progenitor-like  
193 clusters exclusively express progenitor genes, such as Dll1 and as cells move towards the MG-  
194 derived neuronal clusters they upregulate neuronal genes, like Cabp5.

195 Although the trajectory analysis shows that MG progress to neurons through a  
196 progenitor-like state, it also suggests that this state is not identical in the ANT and ANTSi  
197 conditions. The progenitor-like cells in these two conditions cluster separately and although both  
198 clusters express progenitor genes, like Dll1, the pseudotime plot suggests ANT reprogrammed  
199 cells are "closer" to MG than the cells from the ANTSi treated retinas. This led us to hypothesize  
200 that progenitor cells may be kept in a stable, but non-neural state, by STAT pathway activation.  
201 Indeed, the progenitor-like cells highly express various STAT pathway target genes (e.g. Gfap,  
202 Id1, Id3, Socs3, Figure 3F), while MG and MG-derived neurons have reduced or no expression  
203 of STAT targets.

204 *ChIP-seq for Ascl1 in P0 mouse retinal progenitors and reprogrammed Müller glia.*

205 To explore potential mechanisms by which STAT inhibition promotes Ascl1-mediated  
206 retinal regeneration, we carried out ChIP-seq for Ascl1 in MG and compared this with retinal  
207 progenitors. In order to determine the endogenous binding pattern of Ascl1 in retinal progenitor  
208 cells on a genome-wide scale, we performed ChIP-seq for Ascl1 in P0 retina (Figure 5A) and  
209 identified 22,251 peaks using HOMER<sup>27</sup> with a False Discovery Rate (FDR) of 0.1%. The top-



210 scoring motif in these peaks (using MEME) was the canonical Ascl1 E-Box (Figure S2A)<sup>28</sup>. The  
211 great majority of the Ascl1 peaks overlapped with an accessible chromatin region (Figure 5; P0  
212 DNase Track)<sup>29</sup>. We compared the retinal Ascl1 peaks to previous ChIP-seq for Ascl1 in other  
213 neural tissues. For this analysis, we focused on the highest scoring peaks that replicated in two  
214 independent P0 retinal Ascl1-ChIP-seq runs (7587 sites, Figure 5A). When the three-different  
215 neural Ascl1-ChIP-seq datasets were compared, we found that the majority of the Ascl1-bound  
216 regions in each type of neural tissue were unique to that tissue (Figure 5B); for the peaks  
217 present in retina and another neural tissue, there was approximately the same degree of  
218 overlap for each of the combinations, while only a relatively small subset of peaks were  
219 common to all neural tissues (764; Figure 5A-B; Core Ascl1 track). Gene Ontology analysis  
220 using the GREAT algorithm<sup>30</sup> showed that those peaks unique to retina were enriched for eye,  
221 optic and retinal GO terms (for mouse phenotype), while those regions common to all three  
222 neural tissues instead have enrichment for GO terms of non-retinal neural tissues (e.g.  
223 telencephalon; Figure 5B). In addition, the genes associated with these GO terms for the retinal-  
224 specific regions were genes expressed more highly in retina than in other regions of the CNS,  
225 like cerebral cortex or spinal cord (e.g. Rax, Six3, Atoh7, Otx2; Figure 5B), while those genes  
226 associated with the Ascl1-bound regions common to all three neural tissues were potentially  
227 representative of a more generic neural program of differentiation (Notch1, Insm1, and Dll1),  
228 though it is important to note that there are also region-specific regulatory sites for common  
229 targets, like Hes5 and Sox2.

230         To determine the extent to which Ascl1 binds to similar regions in MG as in retinal  
231 progenitors, we performed ChIP-seq for Ascl1 in MG during the reprogramming process.  
232 Retinas from P12 mice (germline-rtTA: *tetO-Ascl1*) were dissociated and the MG were grown in  
233 culture. After 7 days, Ascl1 expression was induced in the purified MG by addition of  
234 doxycycline to the culture medium. Chromatin was then collected after 6 days post-Ascl1  
235 induction and subsequently processed for Ascl1 ChIP-seq. The subsequent sequencing reads

236 were filtered and mapped to the mouse genome (Figure 5C) and peaks called using HOMER. In  
237 total, 47,507 peaks were called with a False Discovery Rate (FDR) of 0.1%; MEME analysis  
238 shows that the top-scoring motif was the canonical Ascl1 E-Box, similar to that described above  
239 for the P0 retina (Figure S2A).

240 We performed a binding site overlap analysis between the peaks from the two cell  
241 populations. As shown in Figure 5E, 31% (14,578/47,507) of Ascl1 binding regions in MG  
242 overlap an 'appropriate' Ascl1 binding site (i.e. one present in P0 retinal progenitor cells);  
243 however, the majority (~70%) of the Ascl1 bound regions in MG are not present in the P0 retina.  
244 This discrepancy is not simply due to the higher number of binding sites in the MG, since 34%  
245 (7,673/22,251) of retinal progenitor Ascl1 binding sites are not bound in the MG. Therefore,  
246 although the majority of P0 retinal progenitor Ascl1 bound regions are also bound by Ascl1 in  
247 MG, there is substantial binding of Ascl1 to "inappropriate" sites in the genome of MG. In  
248 addition, there are also many potential cis-regulatory sites in progenitors that are not bound in  
249 the MG.

250 When we further analyzed the Ascl1 binding sites that are specific to retinal progenitors  
251 and compared them with those bound in the MG using the 'GREAT' gene ontology algorithm,  
252 the majority of top enriched terms related to neurogenesis (e.g. – 'neural retina development',  
253 'layer formation in cerebral cortex'), suggesting that these Ascl1 binding sites are important for  
254 normal neuronal development of the retina and not dispensable binding events (Figure S2B).  
255 Ascl1 binding sites that occurred in both progenitors and MG were enriched for neurogenic and  
256 gliogenic terms (e.g. – 'negative regulation of gliogenesis', 'negative regulation of  
257 oligodendrocyte differentiation') (Figure S2B). However, the majority of Ascl1 binding sites  
258 specific to MG were not associated with retinal development (e.g. – 'filopodium assembly',  
259 'regulation of mitochondrial membrane permeability') (Figure S2B). Therefore, while Ascl1 binds  
260 66% of all appropriate sites in retinal progenitors, the majority of binding sites in MG are  
261 inappropriate and potentially not productive towards neurogenic reprogramming.

262 Studies in induced pluripotent cell reprogramming have shown that induction of  
263 pluripotency genes by Yamanaka factors<sup>31</sup> (Oct4, Sox2, cMyc, and Klf4) is initially limited by the  
264 accessible chromatin sites in the somatic cell genome already bound by existing transcription  
265 factors<sup>32</sup>. We wondered whether the inappropriate sites bound by Ascl1 in MG are due to  
266 opportunistic binding to DNase-Hypersensitive sites (DHSs) that are present in the MG and not  
267 in the retinal progenitors. Therefore, we quantified the overlap between Ascl1 ChIP-seq peaks  
268 and DHSs that are present in MG. As shown in Figure 5D, 78% of Ascl1 binding sites occurred  
269 within DNase-hotspots in the MG and 22% occurred within non-hypersensitive chromatin. This  
270 result suggests that while most of the binding in MG occurs at sites that are already accessible,  
271 between one fifth and one quarter of the Ascl1-bound sites in MG were “pioneered” by Ascl1,  
272 consistent with prior results in other cells<sup>33</sup>. We hypothesized that these pioneer Ascl1 binding  
273 events in MG were actually occurring at regions of DNase-hypersensitivity in the P0 retina. This  
274 scenario would be productive towards the goal of reprogramming the cis-regulatory landscape  
275 of MG towards that of retinal progenitors. Therefore, we quantified the overlap between pioneer  
276 Ascl1 binding sites in MG and P0 DNase-hotspots (Figure 5D). We found that 34%  
277 (3591/10,575) of the pioneered sites overlap a P0 DNase-Hotspot. However, a much greater  
278 number, 66% (6984/10,575) of the pioneered sites, do not overlap a DNase-Hotspot in either P0  
279 retina or MG, and thus are potentially non-productive pioneered sites.

280 The preceding analysis suggests that while a third of Ascl1 pioneering events are  
281 productive for reprogramming towards a retinal progenitor state, a majority of pioneering events  
282 appear to be unproductive towards reprogramming to the retinal progenitor state. We  
283 hypothesized that other transcription factors present in the MG might be collaborating with Ascl1  
284 to direct it to these inappropriate sites<sup>32</sup>. To determine which factors might be associated with  
285 the inappropriate Ascl1 ChIP-seq peaks in MG (i.e. not present in progenitors), we used  
286 HOMER to identify sequence motifs enriched in these regions (for genes that increase >0.75  
287 fold in reprogrammed MG, over P0 progenitors from our previous microarray<sup>34</sup>). We found that

288 *Ascl1* was the top site followed by a generic homeodomain motif, but these regions were also  
289 significantly enriched for the STAT consensus site (Figure 5E). Thus, the activation of the STAT  
290 pathway in the MG after retinal injury may direct *Ascl1* to inappropriate sites on the DNA and  
291 thereby reduce its ability to reprogram MG more fully to progenitors/neurons.

292         Among the most highly upregulated genes in the *Ascl1*-reprogrammed progenitor-like  
293 cells include the Inhibitor of Differentiation genes (*Id1*, *Id2*, and *Id3*). These genes code for  
294 proteins that are similar to bHLH transcription factors, like *Ascl1*, except they lack a DNA-  
295 binding domain, and thus can form heterodimers with the bHLH family of transcription factors  
296 and prevent their ability to activate transcription<sup>35,36</sup>. The scRNA-seq analysis shows that the  
297 *Ascl1*-overexpressing MG that failed to convert to neurons (and retained RPC-like gene  
298 expression) highly expressed *Id* genes *Id1*, *Id2*, and *Id3* (Figure 3F). *Ascl1* ChIP-seq and  
299 DNase-seq from both P0 and MG show strong binding sites at accessible chromatin at both *Id1*  
300 and *Id3* promoters (Figure 5F). Additionally, a previously generated STAT3 ChIP-seq dataset  
301 from oligodendrocytes in the brain (GEO: GSM2650746) indicated STAT3 binding sites in the  
302 same region as the *Ascl1* binding sites (STAT ChIP track, Figure 5F). Taken together, these  
303 findings suggest that STAT pathway activation and/or *Ascl1* binding may induce *Id* gene  
304 expression, which inhibits *Ascl1* from initiating neurogenesis in a subset of MG.

305

#### 306 *ChIP-seq for Ascl1 in control and STATi-treated reprogrammed Müller glia.*

307         To directly assess the effect that STAT pathway activation has on *Ascl1* binding at *Id*  
308 genes and more broadly across the genome during MG reprogramming, we performed an *Ascl1*  
309 ChIP-seq on control and STATi-treated MG. Frozen stocks of MG from P12 germline-rtTA: *tetO-*  
310 *Ascl1* mice were thawed and cultured to confluency for 2 days in high FBS growth media  
311 (Figure 6A). Cells were then given a low FBS media with STATi or vehicle for the remaining 4  
312 DIV. At 3 DIV (1 day after STATi), doxycycline was administered to induce *Ascl1* overexpression

313 in the MG. Cells were then collected and fixed for ChIP-seq after 6 DIV. FASTQ files were  
314 aligned to the mm10 genome using Bowtie2 and peaks were called using MACS2.  
315 Representative tracks show Ascl1 Chip-seq for the Ascl1 expressing MG and sister cells treated  
316 with STATi are shown in Figure 6B. We observed 106,063 and 89,793 high confidence peaks in  
317 the Ascl1 control and Ascl1/STATi-treated samples, respectively (Figure S3A). The majority of  
318 peaks overlapped between the two samples, with 80,169 sites being common to both treatment  
319 conditions. Both datasets contained the canonical Ascl1 E-box as the top scoring motif, as  
320 determined by HOMER, with strong central enrichment of peaks from both datasets around the  
321 Ascl1 motif (Figure S3B).

322         Based on our findings that inappropriate Ascl1 binding sites were frequently found with  
323 the STAT motif, we hypothesized that inhibition of the STAT signal would reduce Ascl1  
324 recruitment to these sites. To identify genes that might be regulated by STAT signaling in the  
325 MG during reprogramming with Ascl1, we performed a differential analysis between the control  
326 Ascl1 and Ascl1/STATi datasets using edgeR<sup>37,38</sup>. Individual peaks were compared between the  
327 two datasets and plotted as a MA plot in Figure 6C. Ascl1 ChIP-seq peaks that were  
328 significantly reduced in the STATi treatment condition (Figure 6C, blue points) were present at  
329 various STAT pathway target genes (e.g. Bcl2, Pias1, Stat5a/b), and Id1 and Id3 were among  
330 these. Figure 6B shows decreased Ascl1 binding at STAT3 bound regions near Id1 and Id3  
331 after STATi treatment, with gray highlights indicating the corresponding (significantly reduced)  
332 peaks from Figure 6C. Together, these findings add further support to the hypothesis that STAT  
333 signaling may redirect Ascl1 to non-productive cis-regulatory regions, and in some cases,  
334 inhibitors of neural reprogramming, like Id1, Id3 and Hes5.

335         In addition to reducing the binding of Ascl1 to STAT target regions in MG, inhibition of  
336 the STAT pathway leads to increases in Ascl1 binding to non-STAT targets. Ascl1 ChIP-seq  
337 peaks that were significantly enriched in the STATi treatment condition (Figure 6C, red points)  
338 were present at neuronal genes associated with amacrine and bipolar cell fates (e.g. Elavl4,

339 Otx2, Isl1, and Prox1) as well as synaptic genes (e.g. Dlg4 and Snap25), consistent with our  
340 observations that this treatment leads to an increase in neuronal differentiation. By contrast,  
341 peaks located near genes associated with progenitor cells were also significantly decreased in  
342 the STATi treatment condition (e.g. Ccnd1 and Ccnd3). Thus, STATi results in enrichment of  
343 Ascl1 binding at neuronal genes, suggesting that inhibiting STAT pathway activation during  
344 reprogramming leads to more productive binding of Ascl1 at genes necessary for neurogenesis.

345

#### 346 *Id genes are dysregulated in the presence of Ascl1*

347 To determine the effects of Ascl1 overexpression and damage on STAT pathway  
348 activation and Id1 expression, we performed a NMDA time course (Figure 7A). Under normal  
349 conditions, in WT animals Id1 is not present at detectable levels in MG (Figure S4A). At 1 day  
350 and 2 days post-NMDA, Id1 is highly expressed in MG but begins to decline at 4 days and  
351 returns to basal levels by 9 days post-NMDA (Figure S4B-F). In the Ascl1-overexpressing mice,  
352 all MG express Id1 at similarly high levels by 2 days post-NMDA; both the Ascl1-overexpressing  
353 GFP+ MG, and the non-Ascl1-overexpressing GFP- Sox2+ MG (Figure 7B). By 4 days post-  
354 NMDA damage, Id1 was found to be at lower levels in the GFP- MG and highly expressed in the  
355 Ascl1 GFP+ MG (Figure 7C). Eleven days after TSA treatment, the GFP+ cells that show signs  
356 of neuronal morphology and downregulation of Sox2 have basal levels of Id1 expression (Figure  
357 7F, orange arrows). By 14 days post-NMDA damage, high Id1 expression became restricted to  
358 the MG that express Ascl1 (the GFP+ MG) (Figure 7D). Additionally, we performed RT-qPCR  
359 for Id1 on whole retinas taken from undamaged WT and Ascl1 overexpressing retinas as well as  
360 NMDA treated retinas (Figure 7E, n = 4 mice per group). Ascl1 overexpressing retinas treated  
361 with NMDA expressed significantly more Id1 at 4 days post-NMDA than all other treatment  
362 groups. Interestingly, the Ascl1-overexpressing retinas have similar levels of Id1 at baseline as  
363 the WT mice treated with NMDA. Taken together, these findings suggest that the normally  
364 transiently activated target genes of STAT become constitutively active in the presence of Ascl1

365 overexpression. Constitutive expression of ID proteins in Ascl1 expressing MG likely results in  
366 the ID proteins binding Ascl1, antagonizing the pro-neurogenic effects of Ascl1<sup>35,36</sup>. Further  
367 evidence supporting this hypothesis is the fact that ANT-treated MG-derived neurons do not  
368 have any detectable Id1 expression (Figure 7F, orange arrows), while the adjacent non-  
369 reprogrammed MG do have Id1 expression (white arrow).

370

## 371 **DISCUSSION:**

372

373 The findings in this report highlight several important features of the reprogramming of  
374 glia to neuronal progenitors and neurons. The Ascl1 ChIP-seq and DNase-seq data reveal that  
375 the reprogrammed MG show similar Ascl1 binding and chromatin accessibility as the newborn  
376 mouse RPCs. However, the reprogrammed MG also have new Ascl1 peaks that are not  
377 normally found during development in RPCs, sites we label as "inappropriate." A significant  
378 number of these inappropriate Ascl1 binding sites are found at genes that are not relevant to  
379 retinal development and are associated with an increase in expression of these genes in the  
380 reprogrammed MG. We further identified a consensus DNA binding motif for STAT3 that was  
381 significantly associated with these inappropriate Ascl1 peaks. Potential STAT targets that could  
382 underlie the effects we observe, include Id1 and Id3, dominant negative regulators of bHLH  
383 gene function. Lastly, this study provides the first evidence combining lineage tracing with EdU-  
384 labeling to demonstrate new neurons can arise from proliferating MG in an adult mammal.

385 One potential target of STAT signaling that could limit the regenerative response in  
386 mammalian MG is Id1. Following injury to the retina, the STAT target gene Id1 is transiently  
387 expressed in MG, but Id1 returns to basal levels within a week. We found that in Ascl1-  
388 overexpressing mice, Id1 expression is maintained in the MG, possibly maintaining the cells in a  
389 progenitor-like state and preventing them from generating new neurons. ID proteins are known  
390 to form dimers with class I bHLH proteins and inhibit their dimerization with class II bHLH factors

391 to inhibit their transcriptional activation activity<sup>35,36</sup>. Additionally, ID proteins can bind directly with  
392 HES proteins to maintain neural progenitors in an undifferentiated state<sup>39-41</sup>. ID proteins have  
393 also been shown to play an important role in other organ systems, such as the pancreas, where  
394 they can bind Hes1 and participate in the dedifferentiation and fate switching of exocrine cells to  
395 endocrine fates<sup>42</sup>. JAK/STAT signaling is known to bias progenitors towards a glial fate in other  
396 regions of the nervous system as well<sup>43-45</sup>. For example, inhibition of the JAK/STAT co-receptor  
397 gp130 in developing cortical progenitors has been found to increase their neurogenic production  
398 at the expense of gliogenesis<sup>46</sup>. Thus, it is possible that STAT activation in astrocytes in other  
399 areas of the nervous system may limit their neurogenic potential via ID proteins in a manner  
400 similar to that we have described in the retinal MG.

401 Previous studies have demonstrated the importance of the source cell's epigenetic  
402 landscape and presence of endogenous transcription factors of that source cell during  
403 reprogramming<sup>32,33</sup>. Fibroblast reprogramming to induced neuronal cells show that the newly  
404 generated cell types still retain their source cell signature. We previously found this to be the  
405 case in MG reprogramming as well<sup>16</sup>, where the MG-derived neurons still express low levels of  
406 glial genes such as Glul or Aqp4. The present study demonstrates the importance of injury  
407 induced STAT pathway activation during reprogramming and shows a successful combinatorial  
408 analysis using epigenetic and gene expression datasets to confirm inappropriate transcription  
409 factor binding associated with non-productive gene expression.

410

411

412

413

414

415



416 **ACKNOWLEDGMENTS:**

417 The authors acknowledge the following funding sources for supporting this work. Grant  
418 #TA-RM-0614-0650-UWA from the Foundation Fighting Blindness to T.A.R., NIH NEI  
419 1R01EY021482 to T.A.R., Allen Distinguished Investigator Award (Paul G. Allen Family  
420 Foundation) to T.A.R. and F.R., a NSF Fellowship to M.S.W. (DGE-0718124), the Vision Core  
421 Grant P30EY01730, NIH NEI Training Grant (EY07031) to L.T., NIH F32 NRSA to B.A.W. (5  
422 F32 DC016480-02), and a NIH NEI F31 NRSA to N.L.J. (5 F31 EY028412-02). We thank  
423 members of the Reh and Bermingham-McDonogh laboratories for their review and valuable  
424 discussion regarding the manuscript. We thank the laboratory of C. Trapnell, specifically D.  
425 Jackson for her help generating the single-cell RNA-seq data. Lastly, the authors thank M.  
426 Nakafuku (Cincinnati Children's) for the tetO-Ascl1-ires-GFP mice.

427

428 **AUTHOR CONTRIBUTIONS:**

429

430 N.L.J. conceived of and performed all in vivo experiments and STAT inhibitor experiments and  
431 analyses. L.T. performed EdU-labeling experiments and contributed to the written manuscript.  
432 P.N. performed cell culture and WB experiments and contributed to the written manuscript.  
433 M.J.H. performed cell culture and contributed to Ascl1 ChIP-seq experiments. B.A.W. assisted  
434 in ChIP-seq analyses and the writing of the manuscript. F.R. Performed whole cell  
435 electrophysiological recordings. N.R. performed in vivo experiments and contributed to cell  
436 counts. M.S.W. conceived of and performed all Ascl1 ChIP-seq and DNase-seq experiments  
437 and analyses. A.C. assisted in scRNA-seq analyses. T.A.R. conceived of all experiments and  
438 performed analyses on sequencing datasets

439

440 **DECLARATION OF INTERESTS:**

441

442 The authors declare no competing interests.

443 **METHODS:**

444

445 **CONTACT FOR REAGENT AND RESOURCE SHARING**

446

447 Further information and requests for resources and reagents should be directed to and will be  
448 fulfilled by the Lead Contact, Thomas A. Reh ([tomreh@uw.edu](mailto:tomreh@uw.edu)).

449

450 **EXPERIMENTAL MODEL AND SUBJECT DETAILS**

451

452 **Mice**

453 *Glast-CreER:LNL-tTA:tetO-mAscl1-ires-GFP* mice and *rtTA germline: tetO-mAscl1-ires-GFP*  
454 mice used in this study were from a mixed background of C57BL/6, B6SJLF1, and other  
455 backgrounds present at The Jackson Laboratory. Mice of both sexes were used in this study.  
456 For in vivo experiments, adult mice over the age of postnatal day 40 were used. Mice were  
457 housed in the specific-pathogen-free (SPF) animal facility at the University of Washington,  
458 Seattle, WA. Mice were housed under controlled conditions. Mice underwent no previous  
459 treatments prior to testing. All procedures performed in this study were approved by the  
460 Institutional Animal Care and Use Committee at the University of Washington, Seattle.

461

462 **Primary Cell Culture**

463 Postnatal day 0, 11/12 retinas of both sexes from *rtTA germline:tetO-Ascl1-ires-GFP* mice were  
464 digested with papain/DNase to single cells and MG were grown in culture as previously  
465 described<sup>34,47</sup>. In brief, retinas were placed in a papain solution with 180 units/mL DNase  
466 (Worthington) and incubated at 37 °C for 10 min. Cells were triturated and added to an equal  
467 ovomucoid (Worthington) volume then spun down at 300 g at 4 °C to pellet. Cells were then  
468 resuspended in Neurobasal with 10 % FBS (Clontech), mEGF (100 ng/mL; R&D Systems), 1  
469 mM L-glutamine (Invitrogen), N2 (Invitrogen), and 1 % Penicillin-Streptomycin (Invitrogen) with  
470 two retinas plated per 10 cm<sup>2</sup> at 37 °C. Media was changed every 2 days until confluent  
471 monolayers of MG were passaged after 7 DIV and doxycycline was added to induce expression  
472 of Ascl1.

473

474 **METHOD DETAILS**

475

476 **Animals:** All mice were housed at the University of Washington. All experiments and protocols  
477 were approved by the University of Washington's Institutional Animal Care and Use Committee.  
478 Adult mice used for in vivo experiments were *Glast-CreER:LNL-tTA:tetO-mAscl1-ires-GFP* mice  
479 and have been previously described<sup>16</sup>. The *Glast-CreER* and *LNL-tTA* mice were from Jackson  
480 Labs and the *tetO-mAscl1-ires-GFP* mice were a gift from M. Nakafuku (University of  
481 Cincinnati). The *rtTA germline: tetO-mAscl1-ires-GFP* mice for in vitro experiments were  
482 generated by crossing Nakafuku's *tetO-mAscl1-ires-GFP* mice onto the germline *rtTA* mice from  
483 Jackson Labs. Mice of both sexes were used in this study and adult mice were treated at ages  
484 comparable to our previously described study<sup>16</sup>.

485  
486 **Ascl1 Chromatin Immunoprecipitation-Sequencing (ChIP-Seq):** P0 retinas or cultured, post-  
487 natal day 12, Müller glia (+/- Ascl1 overexpression, *rtTA germline:tetO-Ascl1-ires-GFP* mice ±  
488 doxycycline) were digested with papain/DNase to single cells and fixed with 0.75 %  
489 formaldehyde for 10 minutes at room temperature. Sonication was performed with a probe  
490 sonicator (Fisher Scientific): 12 pulses, 100 J/pulse, Amplitude: 45, 45 seconds cooling at 4 °C  
491 between pulses. Immunoprecipitation performed with 40 µL anti-mouse IgG magnetic beads  
492 (Invitrogen Cat: 110.31) and 4 µg mouse anti-MASH1 antibody (BD Pharmingen Cat: 556604)  
493 or 4 µg mouse IgG against chromatin from 5 million cells per condition according to Diagenode  
494 LowCell Number Kit using IP and Wash buffers as described in<sup>28</sup>. Libraries were prepared with  
495 standard Illumina adaptors and sequenced to an approximate depth of 36 million reads each.  
496 Sequence reads (36 bp) were mapped to the mouse mm9 genome using bwa (v 0.7.12-r1039).  
497 Merging and sorting of sequencing reads from different lanes was performed with SAMtools  
498 (v1.2). The HOMER software suite was used to determine and score peak calls ('findPeaks'  
499 function, v4.7) as well as motif enrichment ('findMotifs' function, v4.7, using repeat mask). For  
500 STATi and control Ascl1 ChIP-seq, reads were aligned to the mm10 genome using Bowtie2.  
501 The .sam files were converted to sorted .bam files using SAMtools. MACS2 was used to call  
502 peaks with default settings using the broad peaks annotation. Peak overlap analyses were  
503 performed using Bedops. The control Ascl1 ChIP-seq .bam file was downsampled by a factor of  
504 0.69 to normalize the number of mapped reads over the common peaks found between  
505 treatment and control samples. This downsampled .bam file was used for all analyses.  
506 Differential accessibility analysis in Ascl1 ChIP-seq peaks was determined using edgeR as  
507 detailed in the edgeR user guide.

508

509 **DNase I Hypersensitivity-Sequencing (DNase-Seq):** Detailed protocols can be found at  
510 [encodeproject.org](http://encodeproject.org). In brief: nuclei from retina were isolated using 25 strokes of a dounce  
511 homogenizer, tight pestle, in 3 mL homogenization buffer (20 mM tricine, 25 mM D-sucrose, 15  
512 mM NaCl, 60 mM KCl, 2 mM MgCl<sub>2</sub>, 0.5 mM spermidine, pH 7.8) and filtered through a 100 μm  
513 filter and washed with Buffer A (15 mM Tris-HCl, 15 mM NaCl, 60 mM KCl, 1 mM EDTA, 0.5  
514 mM EGTA, 0.5 mM spermidine). Nuclei from Müller glia were isolated using TrypLE  
515 (ThermoFisher) to obtain single cells, followed by incubation with 0.04 % IGEPAL in Buffer A for  
516 10 minutes at 4 °C. Nuclei were incubated at 37 °C for 3 minutes in limiting concentrations of  
517 DNaseI enzyme in Buffer A with calcium supplement. The reaction was stopped using equal  
518 volume of Stop Buffer (50 mM Tris-HCl, 100 mM NaCl, 0.1 % SDS, 100 mM EDTA, 1 mM  
519 spermidine, 0.5 spermine pH 8.0) and subsequently treated with proteinase K and RNase A at  
520 55 °C. Small (<750 bp) DNA fragments were isolated by sucrose ultracentrifugation and end  
521 repaired and ligated with Illumina compatible adaptors. Sequence reads were mapped to mm9  
522 using bowtie (v 0.12.7) and DNaseI peak calling performed with Hotspot  
523 (<http://www.uwencode.org/proj/hotspot/>).

524

525 **Electrophysiology:** Recordings were performed under identical conditions to our previous  
526 study<sup>16</sup>. All mice underwent dark-adaptation prior to euthanasia. Retinas were then removed,  
527 dissected, embedded in agar, and cut into 200 μm thick slices under infrared visualization. All  
528 prep was performed in Ames medium at 32-34 °C and oxygenated with 95 % O<sub>2</sub>/ 5 % CO<sub>2</sub>.  
529 Slices were placed under the microscope and perfused with oxygenated Ames at a rate of ~8  
530 mL per minute. Cells were targeted for recording using video DIC with infrared light (>950 nm),  
531 two-photon (λ = 980 nm), or confocal (λ = 488 nm) microscopy. Cells targeted for light  
532 responses under infrared conditions were exposed to full-field illumination via blue and green  
533 LEDs from a customized condenser. Cells targeted with the 488 nm laser were predominantly  
534 used to record  $R_{in}$  and  $V_{rest}$  properties. Recordings were performed using pulled glass pipettes  
535 (5-6 MΩ) and filled with solution containing (in mM): 123 K-aspartate, 10 HEPES, 1 MgCl<sub>2</sub>, 10  
536 KCl, 1 CaCl<sub>2</sub>, 2 EGTA, 0.5 Tris-GTP, 4 Mg-ATP, and 0.1 Alexa-594 hydrazide.

537

538 **Fluorescence-activated cell sorting (FACS):** After euthanasia of mice, eyes were removed  
539 and retina dissected out and isolated from vitreous and retinal pigmented epithelium. Retinas  
540 were then dissociated in a Papain and DNase I solution for 20 minutes at 37 °C on a nutator.  
541 After incubation, retinas were gently triturated to generate a single-cell suspension, followed by  
542 the addition of Ovomuroid. Cells were then spun down at 300 g at 4 °C then resuspended in

543 Neurobasal medium, passed through a 35  $\mu$ m filter, and transferred to a BSA coated tube prior  
544 to FACS-purification. FACS was performed on a BD FACSAria III Cell Sorter (BD Biosciences)  
545 and the GFP-positive fraction was collected for single-cell RNA-seq. 44,000 cells in total were  
546 captured for single-cell RNA-seq.

547

548 **Immunohistochemistry (IHC):** Upon euthanasia of adult mice, eyes were removed and  
549 corneas dissected away. Globes were then fixed for 1 hour in 4 % PFA in PBS followed by an  
550 overnight incubation in 30 % sucrose in PBS at 4 °C. Fixed eyes were then frozen in O.T.C.  
551 (Sakura Finetek) at -80 °C until sectioned. Frozen eyes were sectioned on a cryostat (Leica) at  
552 16-18  $\mu$ m thick and were stored at -20 °C until staining. All washes were 3 times 20 minutes in  
553 PBS on a rotating plate at room temperature. Slides were washed then blocked in 10 % normal  
554 horse serum, 0.5 % Triton X-100 in PBS for a minimum of 1 hour prior to primary. All primary  
555 antibodies were diluted in blocking solution and applied to tissue for a minimum of 3 hours.  
556 Slides were then washed and incubated with secondary antibodies for a minimum of 2 hours,  
557 which were diluted in PBS. Slides were then washed and cover slipped with Fluoromount-G  
558 (SouthernBiotech). Primary antibodies used were: rabbit anti-Cabp5 (a gift from F. Haeseleer,  
559 1:500), rabbit anti-PSD95 (Abcam, 1:100, Ab-18258-100), mouse anti-Ctbp2 (BD Biosciences,  
560 1:1000, 612044), chicken anti-GFP (Abcam, 1:500, Ab13970), goat anti-Otx2 (R&D Systems,  
561 1:100, BAF1979), goat anti-Sox2 (Santa Cruz, 1:100, SC-17320), rabbit anti-Opn1sw (Millipore,  
562 1:300, AB5407), rabbit anti-Id1 (Biocheck, 1:1000, BCH-1/#37-2). Secondary antibodies used  
563 were all donkey anti-species (Life Technologies) and were diluted 1:300 with a 1:100,000 DAPI  
564 (Sigma) in PBS and were applied in dark conditions. TUNEL staining was performed using the  
565 Promega TUNEL kit. EdU-labelling was performed using the Thermo Fischer Scientific Click-iT  
566 EdU system.

567

568 **Injections:** Intraperitoneal injections of tamoxifen were administered to adult mice for up to five  
569 consecutive days to induce expression of the *tetO-mAscl1-ires-GFP* gene. Tamoxifen was  
570 administered at a concentration of 1.5 mg per 100  $\mu$ L of corn oil. Intravitreal injections of NMDA  
571 were administered at a concentration of 100 mM in PBS at a volume of 1.5  $\mu$ L. Intravitreal  
572 injections of TSA (Sigma) were administered at a concentration of 1  $\mu$ g per  $\mu$ L in DMSO at a  
573 volume of 1.5  $\mu$ L. Intravitreal injections of SH-4-54 STAT-inhibitor (Selleck Chem) were  
574 administered at a concentration of 10 mM in TSA containing DMSO at a volume of 1.5  $\mu$ L. All  
575 intravitreal injections were performed on isoflurane-anesthetized mice using a 32-gauge  
576 Hamilton syringe. For EdU-labelling experiments, NMDA and EdU were intravitreally co-injected

577 in a mixture containing 1  $\mu$ L of 34mM NMDA, 0.5  $\mu$ L EdU (5 mg/mL), and 0.5  $\mu$ L PBS at a  
578 volume of 2  $\mu$ L. Two days later the TSA, STATi, and EdU were intravitreally co-injected in a  
579 mixture containing 1  $\mu$ L TSA (2 mg/mL), 0.5  $\mu$ L EdU (5 mg/mL), and 0.5  $\mu$ L SH-4-54 (25 mg/mL)  
580 at a volume of 2  $\mu$ L. From treatment days 9 through 12, EdU was intraperitoneally injected twice  
581 daily for a total of 8 injections at a concentration of 1 mg/mL EdU at a volume of 100 $\mu$ L in PBS.  
582

583 **Microscopy/cell counts:** All images were taken on a Zeiss LSM880 confocal microscope. For  
584 cell counts, all images were taken at the same magnification and a minimum of 4 fields per  
585 retina were captured as a Z-stack then analyzed in ImageJ (NIH, Bethesda, MD). To be counted  
586 as a positive cell, the marker of interest needed to be viewed in at least 3 planes of the Z-stack  
587 to ensure accurate co-localization. Counts were summed together for a single retina then  
588 percent co-localization was calculated per retina. For the Id1, Sox2, GFP staining figure, all  
589 images were captured at the same magnification, laser settings, and detector settings. In  
590 addition, all sections were stained at the same time in the same manner to show comparable  
591 relative protein expression in each treatment. For synaptic staining images, the Airyscan  
592 detector on the Zeiss LSM880 was used to capture Z-stacks and maximize resolution and co-  
593 localization of synaptic proteins. Airyscan images were then processed in Amira image software  
594 (FEI). The GFP channel was masked and Psd95 that was within this GFP mask in the OPL was  
595 displayed to highlight Müller glial-derived neurons synaptic input. Similarly, the GFP channel  
596 was masked and Ctbp2 that was within this GFP mask in the IPL was displayed to highlight  
597 Müller glial-derived neurons synaptic output.  
598

599 **Quantitative reverse transcription PCR (RT-qPCR):** *Glast-CreER:LNL-tTA:tetO-mAscl1-ires-*  
600 *GFP* mice received 3 days of tamoxifen injections to induce Ascl1 expression on treatment days  
601 1 through 3. On treatment day 13, WT and Ascl1 expressing mice received an intravitreal  
602 injection of 100 mM NMDA in 1.5  $\mu$ L volume. Four days after NMDA administration WT and  
603 Ascl1 expressing mice were euthanized and retinas collected and digested in TRIzol reagent  
604 (Thermo Fischer). RNA was extracted and collected in miRNeasy Mini Kit columns in  
605 accordance with manufacturer instructions (Qiagen). Reverse transcription was performed on 1  
606  $\mu$ g of purified RNA using the iScript Reverse Transcription Supermix kit (Bio-Rad). The cDNA  
607 was then added to SsoFast (Bio-Rad) for qPCR. A total of 4 biological replicates were run for  
608 each condition (WT, WT + NMDA, Ascl1, Ascl1 + NMDA) and each biological replicate was run  
609 in triplicate. Id1 cycles were subtracted from housekeeping gene Gapdh ( $\Delta$ Ct) and then

610 subtracted from WT ( $\Delta\Delta Ct$ ) to determine fold change  $2^{(-\Delta\Delta Ct)}$ . Primers for Gapdh were (5'-  
611 GGCATTGCTCTCAATGACAA-3' and 5'-CTTGCTCAGTGCCTTGCTG-3') and primers used  
612 for Id1 were (5'-TACGACATGAACGGCTGCTACTCA-3' and 5'-  
613 TTACATGCTGCAGGATCTCCACCT-3').

614

615 **Single-cell RNA-sequencing (Single-cell RNA-seq):** Four ANTSi-treated mice (8 eyes) had  
616 their retinas pooled for FACS-purified cells and were spun down at 300 g at 4 °C then  
617 resuspended at a concentration of 1000 cells per  $\mu$ L in a 0.04 % BSA in PBS solution. Cells  
618 were processed through the 10x Genomics Single Cell 3' Chip and processed through the  
619 standard Chromium Single Cell 3' Reagent Kits User Guide protocol with a target capture of  
620 4,000 cells. Library QC was determined by Bioanalyzer (Agilent). Libraries were then  
621 sequenced on Illumina NextSeq 500/550 vs kit and reads were processed through 10x  
622 Genomics Cell Ranger pipeline. Reads were aligned to the mm10 genome and the filtered  
623 output files from Cell Ranger were processed in R using tools in the Seurat package. For Seurat  
624 analyses, the newly generated single-cell RNA-seq dataset from ANTSi-treated mice were  
625 compared with our previously generated WT and ANT-treated datasets<sup>16</sup>.

626

627 **Western Blot/Analysis:** Retinas from P11 *rtTA germline: tetO-mAscl1-ires-GFP* mice were  
628 dissociated and MG were grown in culture as previously described<sup>34,47</sup>. Confluent monolayers  
629 of MG were passaged and doxycycline (1:500) was added to the media to overexpress Ascl1 for  
630 6 days, and a subset of cultures received SH-4-54 STAT-inhibitor (Selleck Chem) on the fifth  
631 day of treatment for 24 hours. MG cultures were lysed with buffer containing 25 mM Tris-HCl  
632 pH 7.5, 150 mM NaCl, 1 mM EDTA, 1 % Triton X-100, 5 % glycerol, 1X protease inhibitor  
633 cocktail, and 1X phosphatase inhibitor cocktail and equal amounts of protein samples were  
634 loaded and run in a 4 % to 20 % SDS gel (Bio-Rad Laboratories). Protein was transferred to a  
635 polyvinylidene fluoride membrane (Thermo Fisher Scientific, Waltham, MA, USA), blocked (5 %  
636 BSA and 0.1 % Tween 20 in 1X TBS) for at least 1 hour at room temperature and stained with  
637 primary antibodies (Phospho-STAT3 Y705 and STAT3, R&D Systems 9131S and 9132S)  
638 diluted in blocking solution overnight at 4 °C. Membranes were washed with 0.1 % Tween 20 in  
639 1X TBS and then incubated with HRP-conjugated secondaries (Bio-Rad Laboratories) diluted in  
640 blocking solution for 1 hour at room temperature. Signals were visualized on X-ray film with a  
641 commercial substrate (SuperSignal West Dura Extended Duration Substrate; Thermo Fisher  
642 Scientific) and quantified using ImageJ software.

643

644 **QUANTIFICATION AND STATISTICAL ANALYSIS**

645

646 **Ascl1 ChIP-Seq:**

647 The HOMER software suite was used to determine and score peak calls ('findPeaks' function,  
648 v4.7) as well as motif enrichment ('findMotifs' function, v4.7, using repeat mask). Peak overlap  
649 analyses were performed using Bedops. Gene Ontology analyses of Ascl1 ChIP-seq peaks  
650 were generated using GREAT algorithm.

651

652 **Immunohistochemistry:**

653 For Otx2 quantification, retinas from 16 ANT-treated mice and 13 ANTSi-treated mice were  
654 analyzed. For Cabp5 quantification, retinas from 6 ANT-treated mice and 8 ANTSi-treated mice  
655 were analyzed. An unpaired *t*-test was performed using Graphpad Prism for each figure. Data is  
656 presented as mean  $\pm$  SEM.

657

658 **RT-qPCR:**

659 Id1 expression was performed on 4 biological replicates from each condition.

660

661 **Single-cell RNA-seq:**

662 Quantification of the percent cells in each cluster was performed in R using the Seurat toolkit.  
663 Cells that were located in either the Müller glial, Progenitor-like, or MG-derived neuron clusters  
664 were identified by which treatment they came from (WT, ANT, ANTSi). The total number of cells  
665 in each cluster from each treatment was then divided by the total number of cells from that  
666 corresponding treatment to generate percentages, which are shown in the bar graph. The  
667 heatmap was created using the doHeatmap function from the Seurat toolkit in R. The intensity  
668 of the log<sub>2</sub> expression is shown.

669

670 **Western Blot:**

671 Quantification of gel bands was performed using ImageJ.

672

673 **DATA AND SOFTWARE AVAILABILITY**

674

675 Database/accession numbers for Ascl1-ChIP-seq and single-cell RNA-seq datasets will be  
676 deposited and described here upon acceptance of this manuscript.

677



678

679 **REFERENCES:**

680

- 681 1 Fischer, A. J. & Reh, T. A. Muller glia are a potential source of neural regeneration in the  
682 postnatal chicken retina. *Nat Neurosci* **4**, 247-252, doi:10.1038/85090 (2001).
- 683 2 Raymond, P. A., Barthel, L. K., Bernardos, R. L. & Perkowski, J. J. Molecular  
684 characterization of retinal stem cells and their niches in adult zebrafish. *BMC Dev Biol* **6**,  
685 36, doi:10.1186/1471-213X-6-36 (2006).
- 686 3 Fausett, B. V. & Goldman, D. A role for alpha1 tubulin-expressing Muller glia in  
687 regeneration of the injured zebrafish retina. *J Neurosci* **26**, 6303-6313,  
688 doi:10.1523/JNEUROSCI.0332-06.2006 (2006).
- 689 4 Wan, J. & Goldman, D. Retina regeneration in zebrafish. *Curr Opin Genet Dev* **40**, 41-47,  
690 doi:10.1016/j.gde.2016.05.009 (2016).
- 691 5 Thummel, R., Kassen, S. C., Montgomery, J. E., Enright, J. M. & Hyde, D. R. Inhibition of  
692 Muller glial cell division blocks regeneration of the light-damaged zebrafish retina. *Dev*  
693 *Neurobiol* **68**, 392-408, doi:10.1002/dneu.20596 (2008).
- 694 6 Lenkowski, J. R. & Raymond, P. A. Muller glia: Stem cells for generation and  
695 regeneration of retinal neurons in teleost fish. *Prog Retin Eye Res* **40**, 94-123,  
696 doi:10.1016/j.preteyeres.2013.12.007 (2014).
- 697 7 Sherpa, T. *et al.* Ganglion cell regeneration following whole-retina destruction in  
698 zebrafish. *Dev Neurobiol* **68**, 166-181, doi:10.1002/dneu.20568 (2008).
- 699 8 Reh, T. A., Nagy, T. & Gretton, H. Retinal pigmented epithelial cells induced to  
700 transdifferentiate to neurons by laminin. *Nature* **330**, 68-71, doi:10.1038/330068a0  
701 (1987).
- 702 9 Coulombre, J. L. & Coulombre, A. J. Regeneration of neural retina from the pigmented  
703 epithelium in the chick embryo. *Dev Biol* **12**, 79-92 (1965).
- 704 10 Karl, M. O. & Reh, T. A. Regenerative medicine for retinal diseases: activating  
705 endogenous repair mechanisms. *Trends Mol Med* **16**, 193-202,  
706 doi:10.1016/j.molmed.2010.02.003 (2010).
- 707 11 Wilken, M. S. & Reh, T. A. Retinal regeneration in birds and mice. *Curr Opin Genet Dev*  
708 **40**, 57-64, doi:10.1016/j.gde.2016.05.028 (2016).
- 709 12 Karl, M. O. *et al.* Stimulation of neural regeneration in the mouse retina. *Proc Natl Acad*  
710 *Sci U S A* **105**, 19508-19513, doi:10.1073/pnas.0807453105 (2008).
- 711 13 Yao, K. *et al.* Wnt Regulates Proliferation and Neurogenic Potential of Muller Glial Cells  
712 via a Lin28/let-7 miRNA-Dependent Pathway in Adult Mammalian Retinas. *Cell Rep* **17**,  
713 165-178, doi:10.1016/j.celrep.2016.08.078 (2016).
- 714 14 Elsaedi, F. *et al.* Notch Suppression Collaborates with Ascl1 and Lin28 to Unleash a  
715 Regenerative Response in Fish Retina, But Not in Mice. *J Neurosci* **38**, 2246-2261,  
716 doi:10.1523/JNEUROSCI.2126-17.2018 (2018).
- 717 15 Ueki, Y. *et al.* Transgenic expression of the proneural transcription factor Ascl1 in Muller  
718 glia stimulates retinal regeneration in young mice. *Proc Natl Acad Sci U S A* **112**, 13717-  
719 13722, doi:10.1073/pnas.1510595112 (2015).

- 720 16 Jorstad, N. L. *et al.* Stimulation of functional neuronal regeneration from Muller glia in  
721 adult mice. *Nature* **548**, 103-107, doi:10.1038/nature23283 (2017).
- 722 17 Nelson, C. M. *et al.* Stat3 defines three populations of Muller glia and is required for  
723 initiating maximal muller glia proliferation in the regenerating zebrafish retina. *J Comp*  
724 *Neurol* **520**, 4294-4311, doi:10.1002/cne.23213 (2012).
- 725 18 Peterson, W. M., Wang, Q., Tzekova, R. & Wiegand, S. J. Ciliary neurotrophic factor and  
726 stress stimuli activate the Jak-STAT pathway in retinal neurons and glia. *J Neurosci* **20**,  
727 4081-4090 (2000).
- 728 19 Ueki, Y., Wang, J., Chollangi, S. & Ash, J. D. STAT3 activation in photoreceptors by  
729 leukemia inhibitory factor is associated with protection from light damage. *J Neurochem*  
730 **105**, 784-796, doi:10.1111/j.1471-4159.2007.05180.x (2008).
- 731 20 Todd, L., Squires, N., Suarez, L. & Fischer, A. J. Jak/Stat signaling regulates the  
732 proliferation and neurogenic potential of Muller glia-derived progenitor cells in the  
733 avian retina. *Sci Rep* **6**, 35703, doi:10.1038/srep35703 (2016).
- 734 21 Kassen, S. C. *et al.* CNTF induces photoreceptor neuroprotection and Muller glial cell  
735 proliferation through two different signaling pathways in the adult zebrafish retina. *Exp*  
736 *Eye Res* **88**, 1051-1064, doi:10.1016/j.exer.2009.01.007 (2009).
- 737 22 Zhao, X. F. *et al.* Leptin and IL-6 family cytokines synergize to stimulate Muller glia  
738 reprogramming and retina regeneration. *Cell Rep* **9**, 272-284,  
739 doi:10.1016/j.celrep.2014.08.047 (2014).
- 740 23 Erickson, P. A., Fisher, S. K., Anderson, D. H., Stern, W. H. & Borgula, G. A. Retinal  
741 detachment in the cat: the outer nuclear and outer plexiform layers. *Invest Ophthalmol*  
742 *Vis Sci* **24**, 927-942 (1983).
- 743 24 Butler, A., Hoffman, P., Smibert, P., Papalexi, E. & Satija, R. Integrating single-cell  
744 transcriptomic data across different conditions, technologies, and species. *Nat*  
745 *Biotechnol* **36**, 411-420, doi:10.1038/nbt.4096 (2018).
- 746 25 Trapnell, C. *et al.* The dynamics and regulators of cell fate decisions are revealed by  
747 pseudotemporal ordering of single cells. *Nat Biotechnol* **32**, 381-386,  
748 doi:10.1038/nbt.2859 (2014).
- 749 26 Qiu, X. *et al.* Single-cell mRNA quantification and differential analysis with Census. *Nat*  
750 *Methods* **14**, 309-315, doi:10.1038/nmeth.4150 (2017).
- 751 27 Heinz, S. *et al.* Simple combinations of lineage-determining transcription factors prime  
752 cis-regulatory elements required for macrophage and B cell identities. *Mol Cell* **38**, 576-  
753 589, doi:10.1016/j.molcel.2010.05.004 (2010).
- 754 28 Castro, D. S. *et al.* A novel function of the proneural factor Ascl1 in progenitor  
755 proliferation identified by genome-wide characterization of its targets. *Genes Dev* **25**,  
756 930-945, doi:10.1101/gad.627811 (2011).
- 757 29 Wilken, M. S. *et al.* DNase I hypersensitivity analysis of the mouse brain and retina  
758 identifies region-specific regulatory elements. *Epigenetics Chromatin* **8**, 8,  
759 doi:10.1186/1756-8935-8-8 (2015).
- 760 30 McLean, C. Y. *et al.* GREAT improves functional interpretation of cis-regulatory regions.  
761 *Nat Biotechnol* **28**, 495-501, doi:10.1038/nbt.1630 (2010).

- 762 31 Takahashi, K. & Yamanaka, S. Induction of pluripotent stem cells from mouse embryonic  
763 and adult fibroblast cultures by defined factors. *Cell* **126**, 663-676,  
764 doi:10.1016/j.cell.2006.07.024 (2006).
- 765 32 Chronis, C. *et al.* Cooperative Binding of Transcription Factors Orchestrates  
766 Reprogramming. *Cell* **168**, 442-459 e420, doi:10.1016/j.cell.2016.12.016 (2017).
- 767 33 Wapinski, O. L. *et al.* Hierarchical mechanisms for direct reprogramming of fibroblasts to  
768 neurons. *Cell* **155**, 621-635, doi:10.1016/j.cell.2013.09.028 (2013).
- 769 34 Pollak, J. *et al.* ASCL1 reprograms mouse Muller glia into neurogenic retinal progenitors.  
770 *Development* **140**, 2619-2631, doi:10.1242/dev.091355 (2013).
- 771 35 Benezra, R., Davis, R. L., Lockshon, D., Turner, D. L. & Weintraub, H. The protein Id: a  
772 negative regulator of helix-loop-helix DNA binding proteins. *Cell* **61**, 49-59 (1990).
- 773 36 Ruzinova, M. B. & Benezra, R. Id proteins in development, cell cycle and cancer. *Trends*  
774 *Cell Biol* **13**, 410-418 (2003).
- 775 37 Robinson, M. D., McCarthy, D. J. & Smyth, G. K. edgeR: a Bioconductor package for  
776 differential expression analysis of digital gene expression data. *Bioinformatics* **26**, 139-  
777 140, doi:10.1093/bioinformatics/btp616 (2010).
- 778 38 McCarthy, D. J., Chen, Y. & Smyth, G. K. Differential expression analysis of multifactor  
779 RNA-Seq experiments with respect to biological variation. *Nucleic Acids Res* **40**, 4288-  
780 4297, doi:10.1093/nar/gks042 (2012).
- 781 39 Bai, G. *et al.* Id sustains Hes1 expression to inhibit precocious neurogenesis by releasing  
782 negative autoregulation of Hes1. *Dev Cell* **13**, 283-297, doi:10.1016/j.devcel.2007.05.014  
783 (2007).
- 784 40 Boareto, M., Iber, D. & Taylor, V. Differential interactions between Notch and ID factors  
785 control neurogenesis by modulating Hes factor autoregulation. *Development* **144**, 3465-  
786 3474, doi:10.1242/dev.152520 (2017).
- 787 41 Nam, H. S. & Benezra, R. High levels of Id1 expression define B1 type adult neural stem  
788 cells. *Cell Stem Cell* **5**, 515-526, doi:10.1016/j.stem.2009.08.017 (2009).
- 789 42 Gomez, D. L. *et al.* Neurogenin 3 Expressing Cells in the Human Exocrine Pancreas Have  
790 the Capacity for Endocrine Cell Fate. *PLoS One* **10**, e0133862,  
791 doi:10.1371/journal.pone.0133862 (2015).
- 792 43 Guillemot, F. Cell fate specification in the mammalian telencephalon. *Prog Neurobiol* **83**,  
793 37-52, doi:10.1016/j.pneurobio.2007.02.009 (2007).
- 794 44 Bonni, A. *et al.* Regulation of gliogenesis in the central nervous system by the JAK-STAT  
795 signaling pathway. *Science* **278**, 477-483 (1997).
- 796 45 He, F. *et al.* A positive autoregulatory loop of Jak-STAT signaling controls the onset of  
797 astroglialogenesis. *Nat Neurosci* **8**, 616-625, doi:10.1038/nn1440 (2005).
- 798 46 Barnabe-Heider, F. *et al.* Evidence that embryonic neurons regulate the onset of cortical  
799 gliogenesis via cardiotrophin-1. *Neuron* **48**, 253-265, doi:10.1016/j.neuron.2005.08.037  
800 (2005).
- 801 47 Ueki, Y. *et al.* P53 is required for the developmental restriction in Muller glial  
802 proliferation in mouse retina. *Glia* **60**, 1579-1589, doi:10.1002/glia.22377 (2012).
- 803 48 Quinlan, A. R. & Hall, I. M. BEDTools: a flexible suite of utilities for comparing genomic  
804 features. *Bioinformatics* **26**, 841-842, doi:10.1093/bioinformatics/btq033 (2010).
- 805

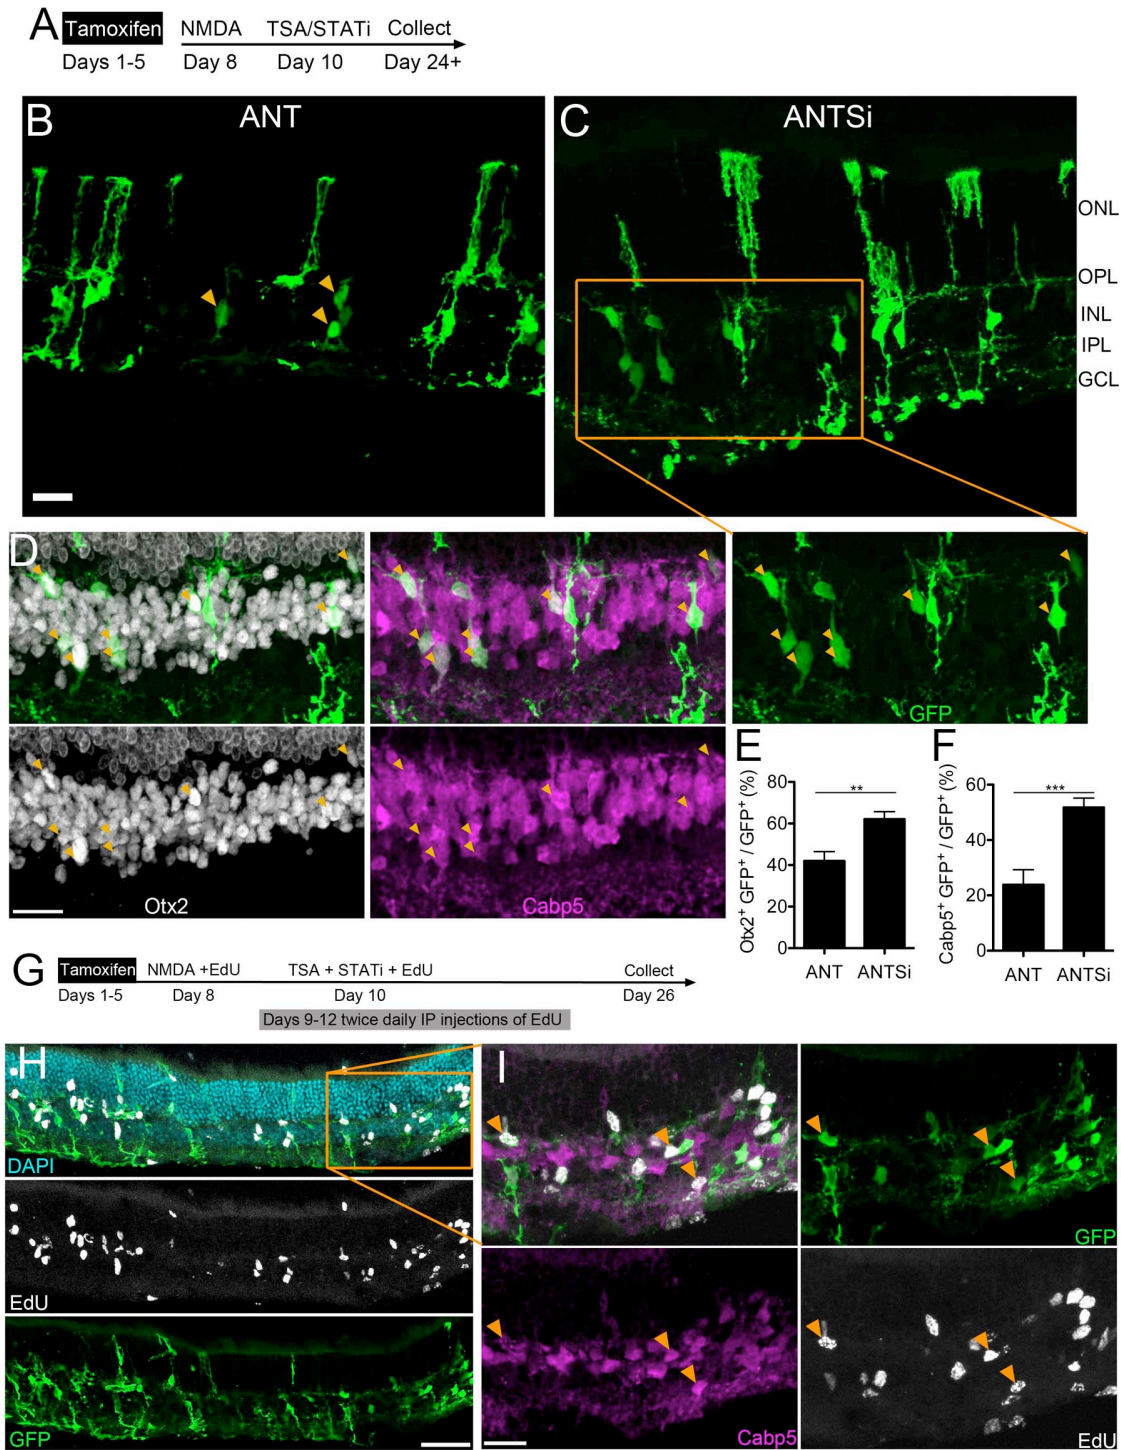

**Figure 1 | STAT pathway inhibition increases number of Müller glial-derived neurons. A)** Experimental paradigm for increasing MG-derived regeneration efficiency. Tamoxifen is administered for up to 5 consecutive

days, followed by NMDA damage a few days after tamoxifen, followed by administration of TSA and/or STAT inhibition a couple days after damage. Retinas were collected a minimum of two weeks after TSA/STATi. **B)** Representative image showing ANT-treated adult retina with MG-derived neurons. **C)** Representative image showing ANTSi-treated adult retina with increased number of MG-derived neurons. **D)** Shows enlargement of ANTSi-treated retinas from **C**. Orange arrows indicate Cabp5+ Otx2+ GFP+ cells. All images are flattened Z-stacks. Scale bars for **B-C** are 20  $\mu\text{m}$ . ONL = Outer Nuclear Layer, OPL = Outer Plexiform Layer, INL = Inner Nuclear Layer, IPL = Inner Plexiform Layer, GCL = Ganglion Cell Layer. **E)** Quantification of Otx2 in ANT (n = 16) and ANTSi-treated (n = 13) retinas. **F)** Quantification of Cabp5 in ANT (n = 6) and ANTSi-treated (n = 8) retinas. ANT vs ANTSi treatments in **E** and **F** were significantly different by unpaired *t*-test at \*\*P=0.0023 and \*\*\*P=0.0006, respectively. **G)** Experimental paradigm for testing where ANTSi-treated MG proliferate prior to neurogenesis. **H)** Representative image from proliferation experiment showing EdU and GFP colocalization. **I)** Shows enlargement of **H** and highlights GFP+ EdU+ Cabp5+ MG-derived neurons (orange arrows). Scale bars for **H-I** are 50  $\mu\text{m}$  and 20  $\mu\text{m}$ , respectively.

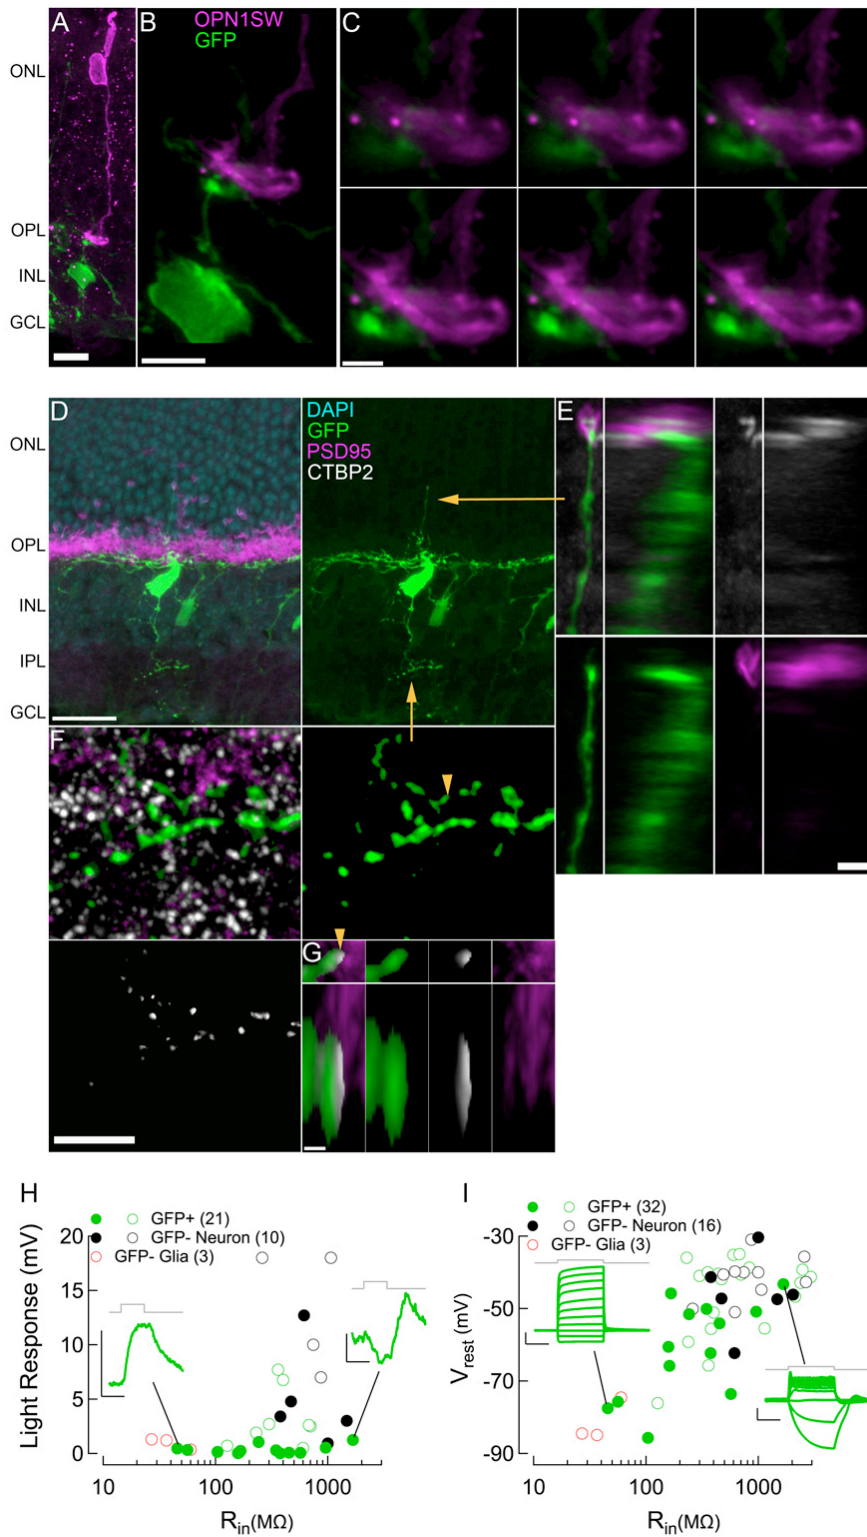

**Figure 2 | ANTSi-treated MG-derived neurons integrate into existing retinal circuits. A and B** Example images of MG-derived neuron (green) contacting cone photoreceptors (magenta) in the OPL, scale bars are 10  $\mu$ m and 5  $\mu$ m, respectively. **C**) Enlargement of **B** showing 0.18  $\mu$ m z-stack steps of the MG-derived neurons

making contact with cone pedicle, scale bar is 2  $\mu\text{m}$ . **D)** Example image of MG-derived neuron with neuronal process in OPL and IPL, scale bar is 20  $\mu\text{m}$ . **E)** Enlargement of yellow arrow from **D** showing a Psd95+ Ctbp2+ photoreceptor synapse onto an apical MG-derived neuronal process in ONL. Left image sets show XY projection and right image sets show YZ projection, scale bar is 2  $\mu\text{m}$ . **F)** Enlargement of yellow arrow from **D** showing Ctbp2 staining within the MG-derived neuronal processes in IPL. Upper right image shows stringent GFP mask used to identify Ctbp2 puncta within MG-derived neurons, scale bar is 5  $\mu\text{m}$ . **G)** Enlargement of yellow arrowhead from **F** showing Ctbp2 within masked GFP process, directly apposed to Psd95 staining, consistent with synaptic specializations. Upper image sets show XY projection and lower image sets show XZ projection, scale bar is 0.5  $\mu\text{m}$ . **H)** Population data for input resistance and visual responses recorded with the current-clamp technique. **I)** Population data for input resistance and resting membrane potential measurements. **H** and **I**, Solid colored circles indicate new measurements recorded from ANTSi treatment condition and hollow colored circles indicate measurements from ANT treatment condition from a previous study<sup>16</sup>. Green traces in **H** show maximum evoked light response from 500-ms luminance stimulation for MG (left) and MG-derived neuron (right). Green traces in **I** show representative responses to equal increasing steps of injected current for MG (left) and MG-derived neuron (right). ANTSi-treated recordings were performed at 2, 5, and 7 weeks post-TSA and STATi administration.

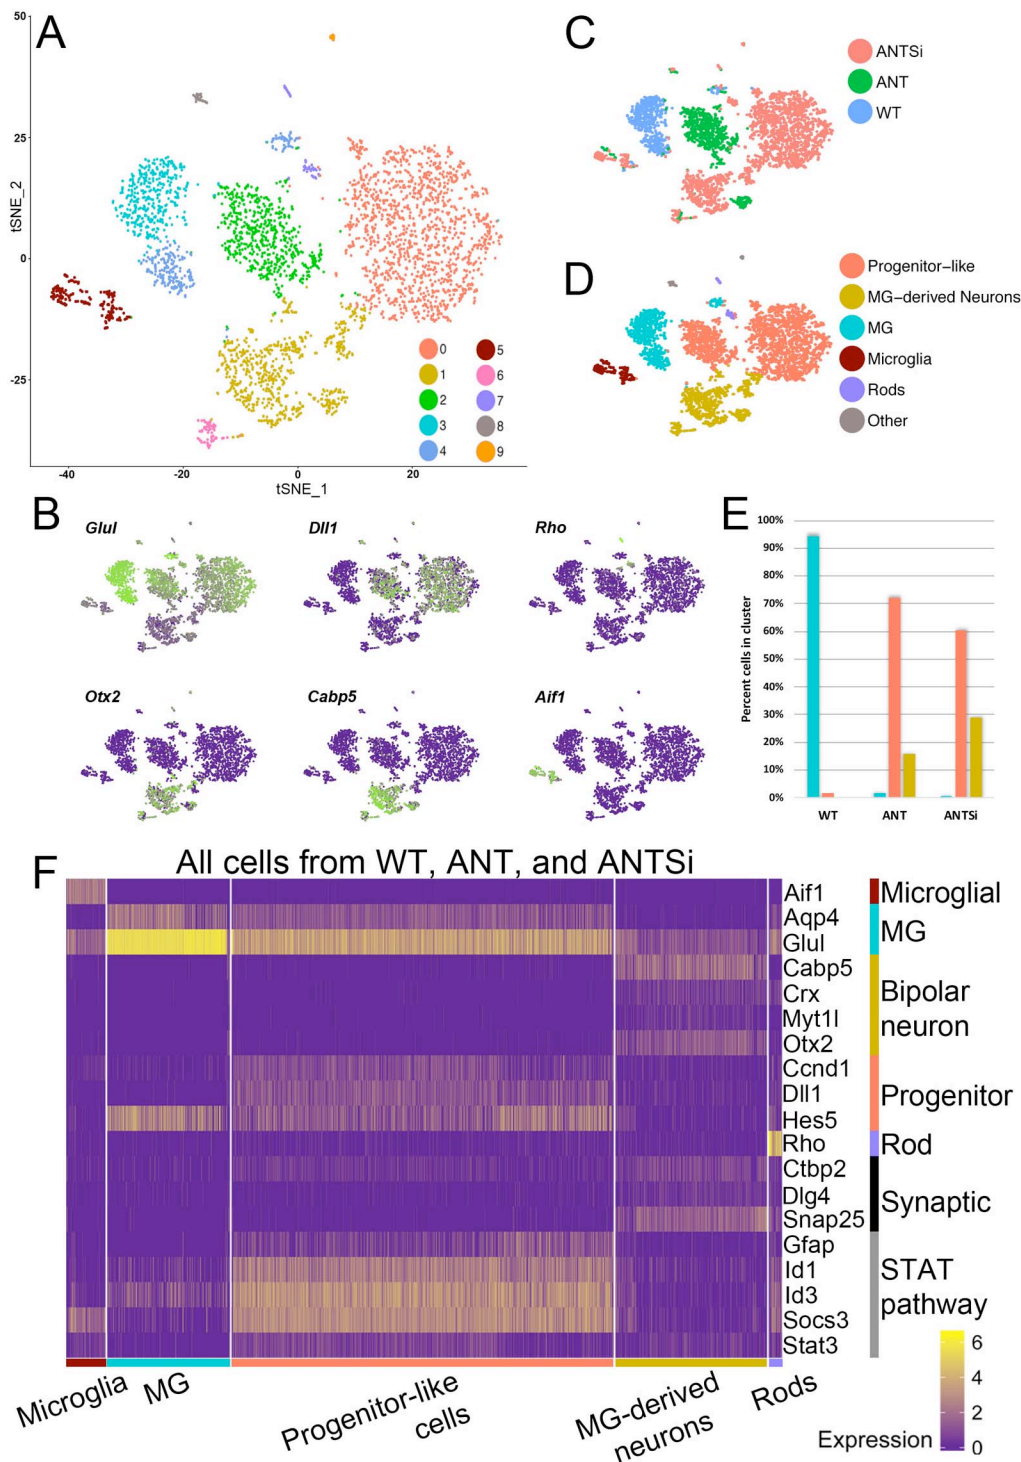

**Figure 3 | ANTSi treatment results in more MG-derived neurons by scRNA-seq.** **A**) A tSNE plot of FACS-purified WT MG and ANT-treated cells from our previous study<sup>16</sup>, and ANTSi-treated cells. **B**) Feature plots of glial (*Glul*), progenitor (*Dll1*), neuronal (*Cabp5* and *Otx2*), rod (*Rho*), and microglial (*Aif1*) gene expression to identify clusters by cell type. Green shows high-expressing, purple shows non-expressing cells. **C**) Plot from **A** colored by treatment condition. **D**) Clusters pseudo-colored by cell type as determined by **C**. Microglia and rods



made up contaminating populations of ~5% and 2% of the total cells in each treatment group, respectively. **E)** Graph showing the fraction of each treatment that was comprised of MG, Progenitor-like cells, and MG-derived neurons. ANTSi treatment increases the population of MG-derived neurons and decreases the number of progenitor-like cells relative to ANT treatment. **F)** Heatmap showing all cells from all three treatments. MG-derived neurons express synaptic genes and do not express Stat pathway targets. Progenitor-like cells highly express Stat pathway targets. Scale shows log<sub>2</sub> expression.

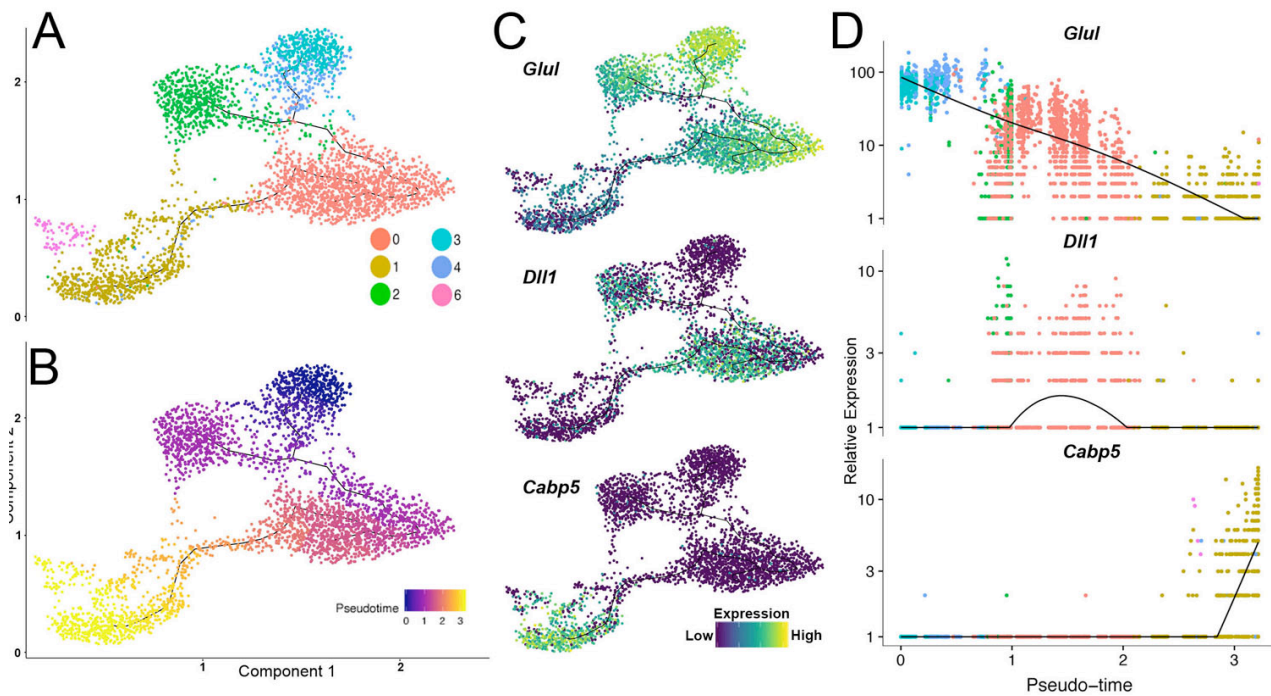

**Figure 4 | Pseudotime analysis of scRNA-seq datasets. A)** Trajectory analysis in Monocle showing clusters from subset of data that includes MG, Progenitor-like cells, and MG-derived neurons. **B)** Trajectory analysis showing pseudotime progression, with cluster 3 (from **A**) being the root state. **C, D)** Gene expression of *Glul*, *Dll1*, and *Cabp5* shown as trajectory plot **C**, and pseudotime plot **D**.

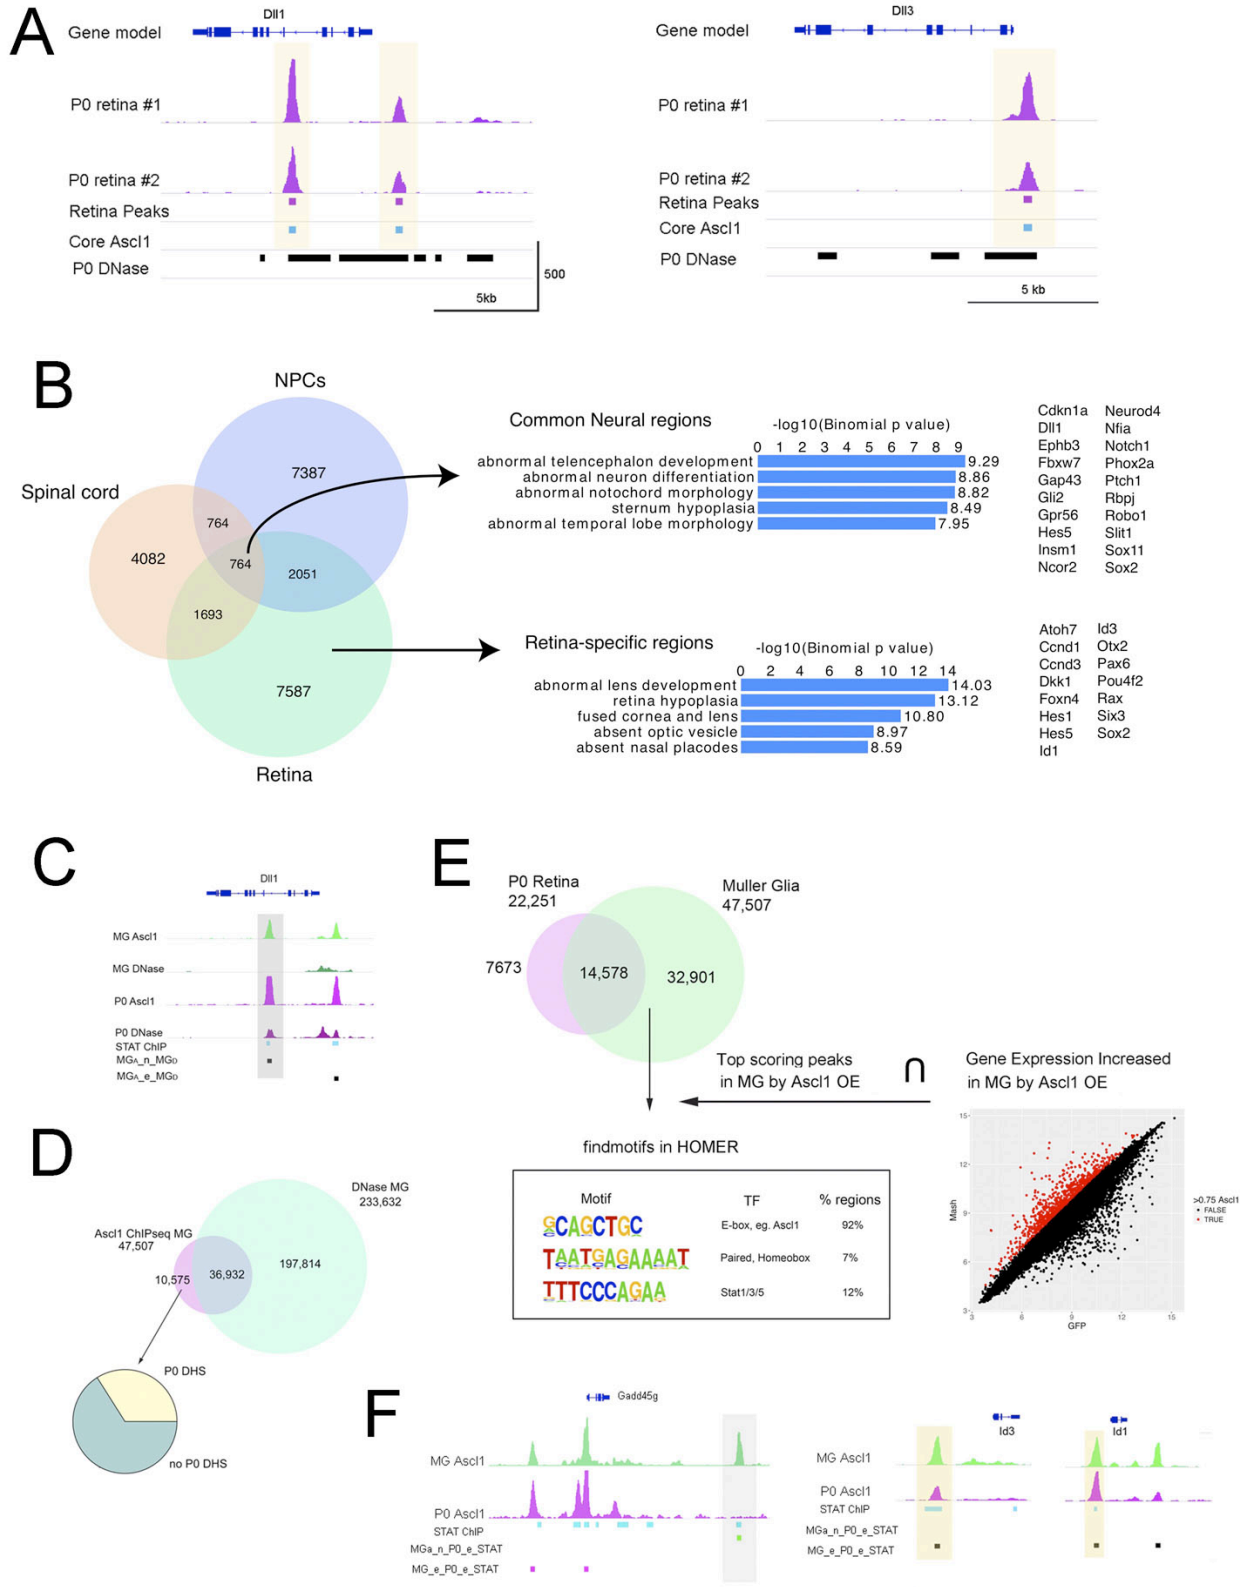

**Figure 5 | Ascl1 ChIP-seq from Ascl1-overexpressing MG and P0 retinal progenitors. A)** Epigenetic analyses of progenitor genes *Dll1* and *Dll3*. Tracks show biological replicate Ascl1 ChIP-seq peaks from P0 whole retina (P0 retina #1, #2), bars indicate peaks that were called from peak-calling algorithm HOMER with

FDR of 0.1% (Retina Peaks track), peaks that were called from retinal, spinal cord, and NPC Ascl1 ChIP-seq datasets (Core Ascl1 track), and DNase-seq peaks from P0 whole retina showing accessible chromatin (P0 DNase track). Yellow highlights indicate core/common binding sites. Scale at the bottom track (X-axis = kilobases of genomic DNA, Y-axis = reads per million, RPM). **B**) Venn diagram showing proportions of overlap for Ascl1 ChIP-seq peaks between P0 retina, NPCs, and spinal cord (Left). Gene Ontology analysis of retinal-specific and core/common Ascl1 ChIP-seq peaks using GREAT algorithm and example genes in these categories (Right). **C**) Epigenetic comparison of Ascl1-overexpressing MG (MG Ascl1 and MG DNase tracks) with P0 developing retina (P0 Ascl1 and P0 DNase tracks). Additional tracks showing previously described Stat3 ChIP-seq peaks from brain oligodendrocytes (STAT ChIP) and comparative peak overlap analyses of Ascl1 peaks without DHSs (MG<sub>A\_n</sub>\_MG<sub>D</sub>) or with DHSs (MG<sub>A\_e</sub>\_MG<sub>D</sub>). **D**) Above, Venn diagram showing proportions of overlap of Ascl1 ChIP-seq peaks with DNase-seq peaks from Ascl1-overexpressing MG. Below, Pie chart showing the proportion of Ascl1 ChIP-seq peaks that have a P0 DNase peak present. **E**) Venn diagram showing proportions of overlap from Ascl1 ChIP-seq peaks between P0 developing retina and Ascl1-overexpressing MG (Top). Integrative analysis looking for motifs that were enriched at Ascl1-overexpressing MG-specific Ascl1 peaks (developmentally inappropriate), are located within  $\pm 5$ kb of the T.S.S., and are associated with 0.75 increase in gene expression (from a previous Ascl1-virus vs GFP-virus microarray). Top scoring motifs meeting these criteria are presented in box (E-box 92%, Paired homebox 7%, Stat1/3/5 12%) (Below). **F**) Epigenetic comparison of Gadd45g, Id1, and Id3 gene loci in Ascl1-overexpressing MG (MG Ascl1) and P0 developing retina (P0 Ascl1). Additional tracks showing previously described Stat3 ChIP-seq peaks (STAT ChIP), and comparative peak overlap analyses of sites containing a MG Ascl1 peak, a P0 Ascl1 peak, and a Stat3 peak (MG<sub>A\_e</sub>\_P0<sub>e</sub>\_STAT) or sites containing a MG Ascl1 peak, a Stat3 peak, but no P0 Ascl1 peak (MG<sub>A\_n</sub>\_P0<sub>e</sub>\_STAT). Yellow highlights indicate strong Ascl1 binding sites during development and forced Ascl1 expression, Grey highlights indicate anomalies.

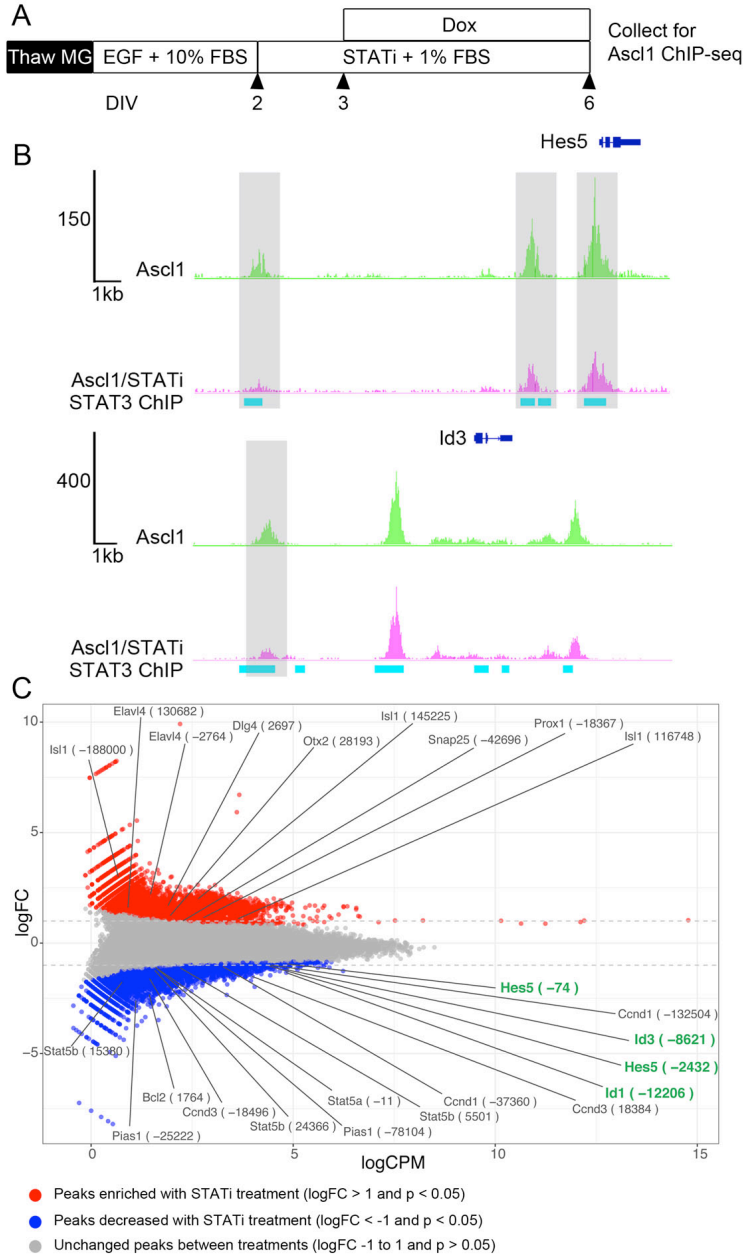

**Figure 6 | Ascl1 ChIP-seq from Ascl1-overexpressing MG with or without STATi. A)** Experimental paradigm for Ascl1 ChIP-seq. **B)** Representative tracks of Ascl1 ChIP-seq datasets from Ascl1 and Ascl1/STATi conditions, and STAT3 ChIP-seq data from oligodendrocytes (GEO: GSM2650746). Gray highlights show peaks that were significantly decreased in STATi-treated cells. **C)** MA plot of all Ascl1 and Ascl1/STATi-treated Ascl1 ChIP-seq peaks. Red shows peaks that were significantly enriched in the STATi-treated cells with a  $\log_{2}FC > 1$  and blue shows peaks that were significantly decreased in the STATi-treated cells with a  $\log_{2}FC < -1$ .

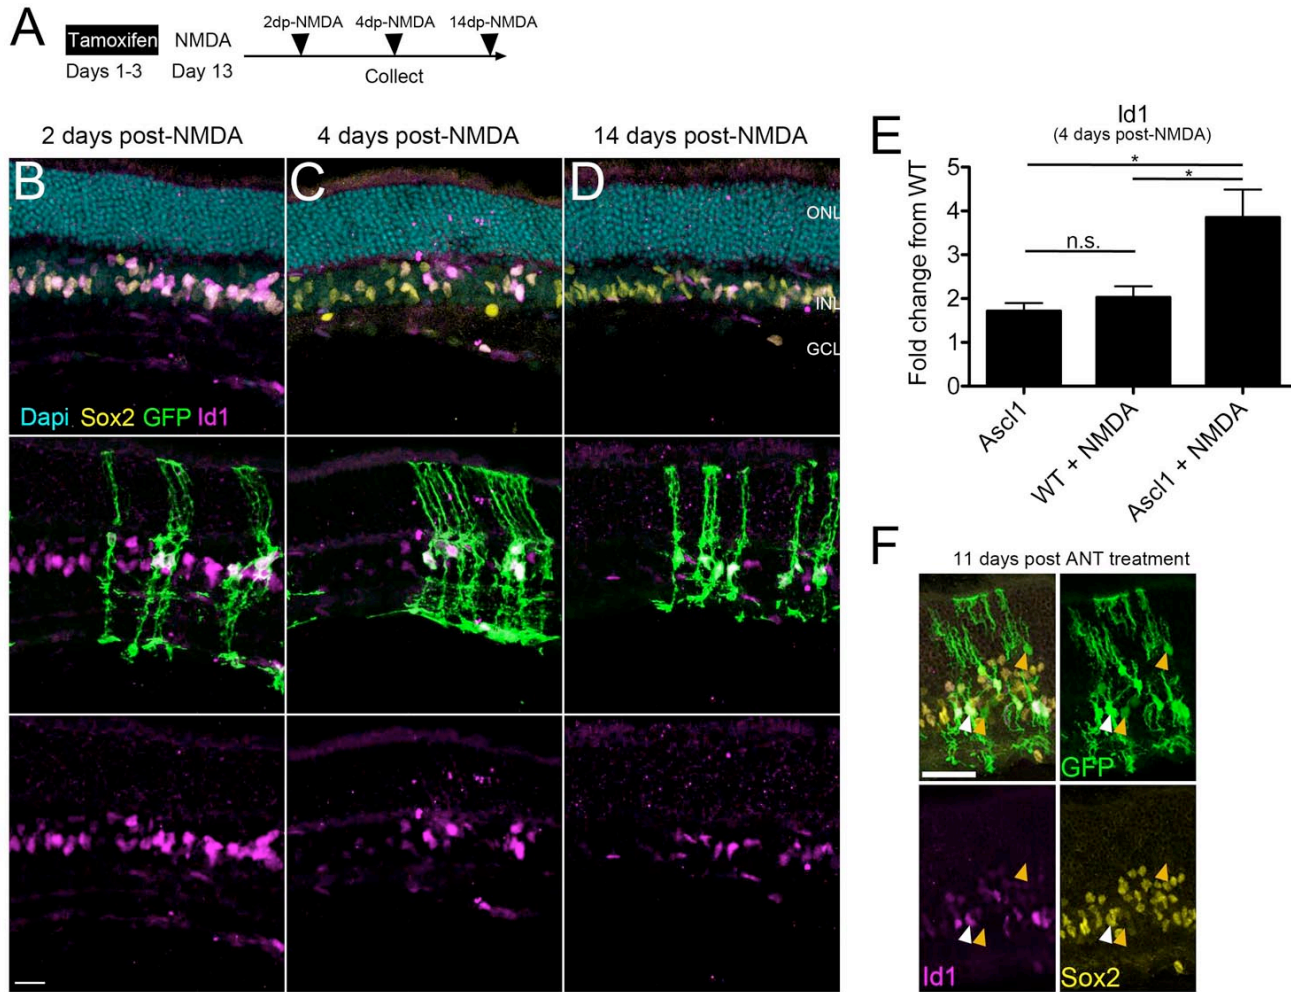

**Figure 7 | Ascl1-overexpression results in dysregulated STAT-target genes. A)** Experimental paradigm for analyzing STAT-target genes in Ascl1-overexpressing MG. **B)** Both GFP- Sox2+ and Ascl1-expressing GFP+ MG express Id1 2 days after NMDA damage. **C)** Ascl1+ cells have higher expression of Id1 relative to GFP- MG (Sox2+ cells) 4 days after NMDA damage. **D)** Id1 expression is reduced in GFP- MG but remains in the Ascl1-expressing GFP+ MG 14 days after NMDA damage. Note, the flat Id1+ nuclei in all images not labelled with GFP are endothelial cells. Scale bars for **B-D** are 20  $\mu$ m. **E)** Graph showing RT-qPCR for Id1 gene expression relative to WT on retinas treated 4 days post-NMDA. One-way ANOVA with Tukey's post-test; \* $P < 0.05$ ,  $N = 4$  biological replicates per condition run in triplicate. **F)** Id1 expression is reduced in GFP- MG but remains in the Ascl1-expressing GFP+ MG 14 days after ANT treatment (white arrows). MG-derived neurons (orange arrows) do not express Id1. Scale bar is 40  $\mu$ m.

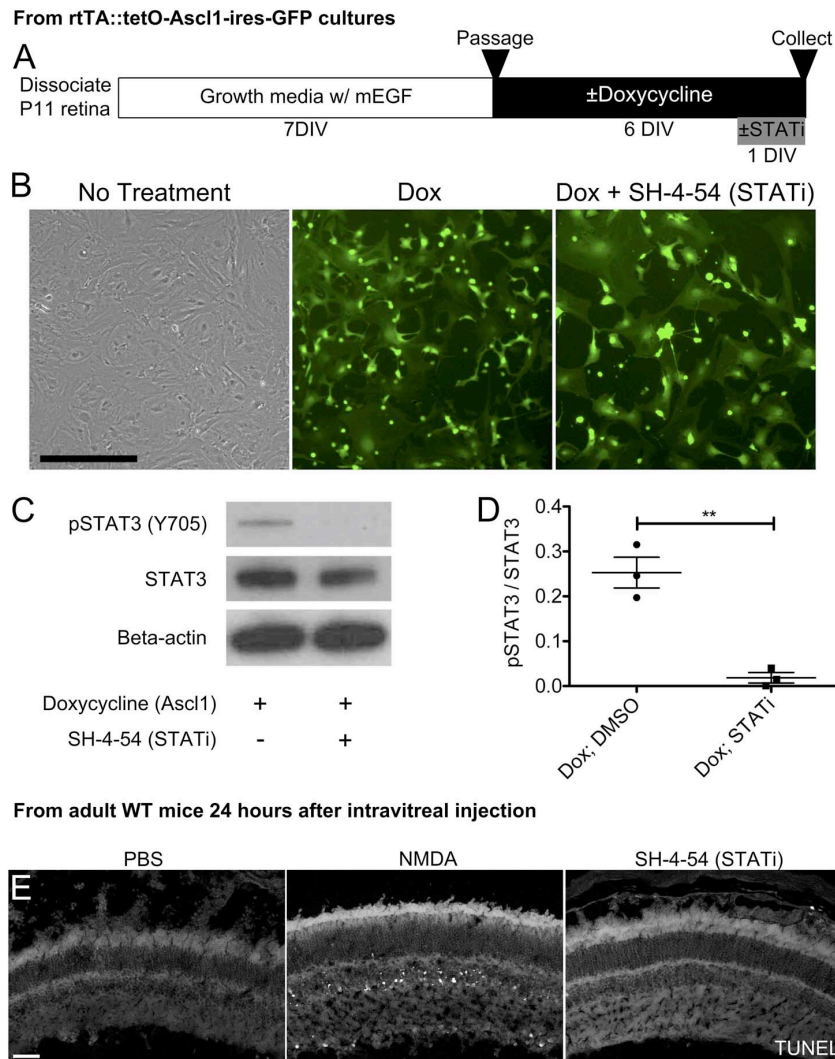

**Figure S1 | STAT inhibitor SH-4-54 inhibits pSTAT3 in MG.** **A)** Experimental paradigm for analyzing STAT3 phosphorylation by western blot in MG. P11 retinas were dissociated and grown in a growth media containing mEGF for 7 DIV. MG were passaged to eliminate residual neurons and cultured in a media containing doxycycline to induce Ascl1 expression for 6 DIV. On the sixth day, the STATi SH-4-54 was added then cells were harvested 24 hours later for WB. **B)** Representative images from confluent cultures of non-treated, Dox-treated, and Dox + STATi-treated MG just before harvesting. **C)** Representative western blot for pSTAT3 (Y705), STAT3, and Beta-actin on non-treated, Dox-treated, and Dox+ STATi-treated MG cultures. **D)** Graph showing quantification of western blot bands was significantly different by One- way ANOVA with Tukey's post-test, \*P < 0.05, \*\*\*P < 0.0001. **E)** Representative image of WT retinas injected with either PBS, NMDA, or SH-4-54 and collected 24 hours later for TUNEL staining. Scale bars for **B** and **E** are 25 and 40  $\mu$ m, respectively.

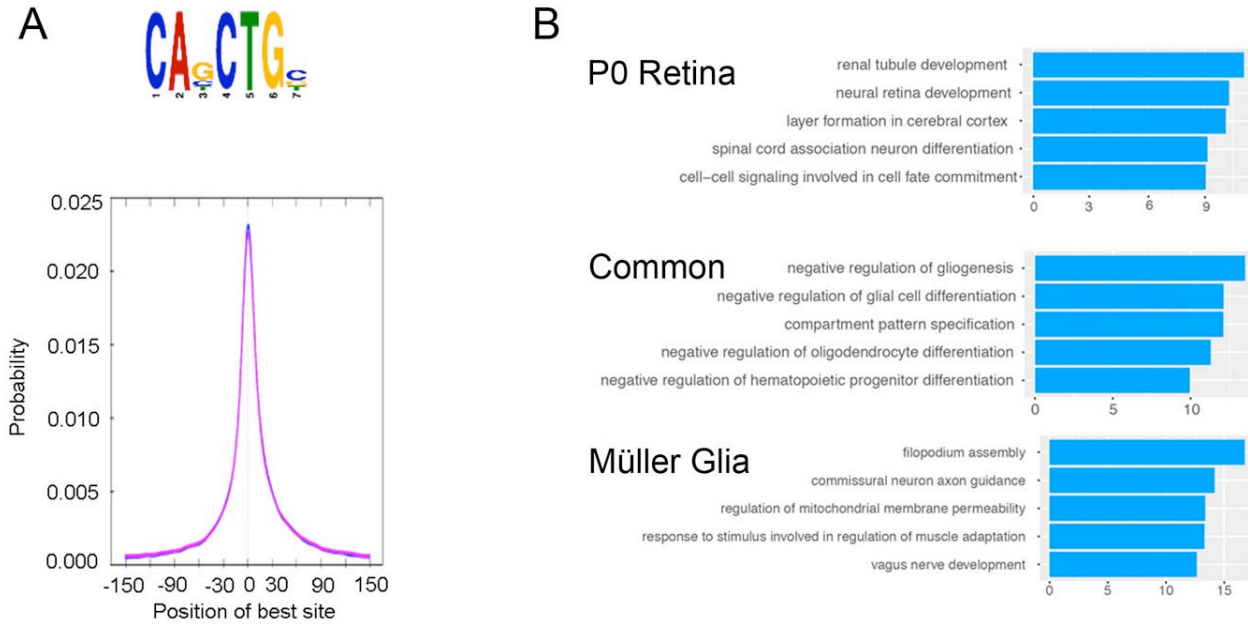

**Figure S2 | Analysis of P0 and MG Ascl1 ChIP-seq peaks. A)** Motif enrichment analysis from MEME of top scoring motif from P0 Ascl1 ChIP-seq (2 replicates) and diagram showing central enrichment around the Ebox motif. **B)** Gene ontology analysis from GREAT showing top 5 enriched categories by  $-\log_{10}$  (binomial p value) for P0-specific peaks, Common peaks, and MG-specific peaks.



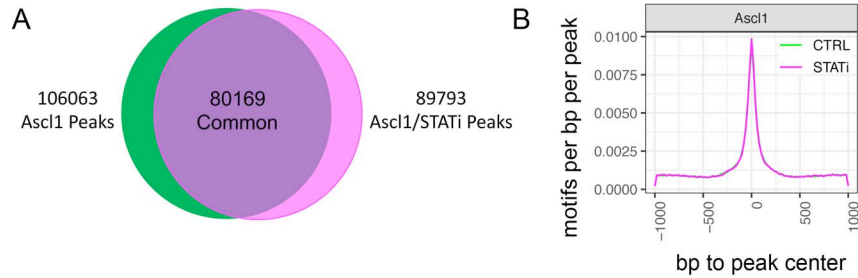

**Figure S3 | Analysis of MG Ascl1 ChIP-seq peaks from control and STATi treatments. A)** Venn diagram of all Ascl1 ChIP-seq peaks from control (Ascl1) and STATi (Ascl1/STATi) treatment conditions. 80,169 peaks were common between the two samples. **B)** Diagram from HOMER analysis showing central enrichment around the Ebox motif for control and STATi treatment conditions.

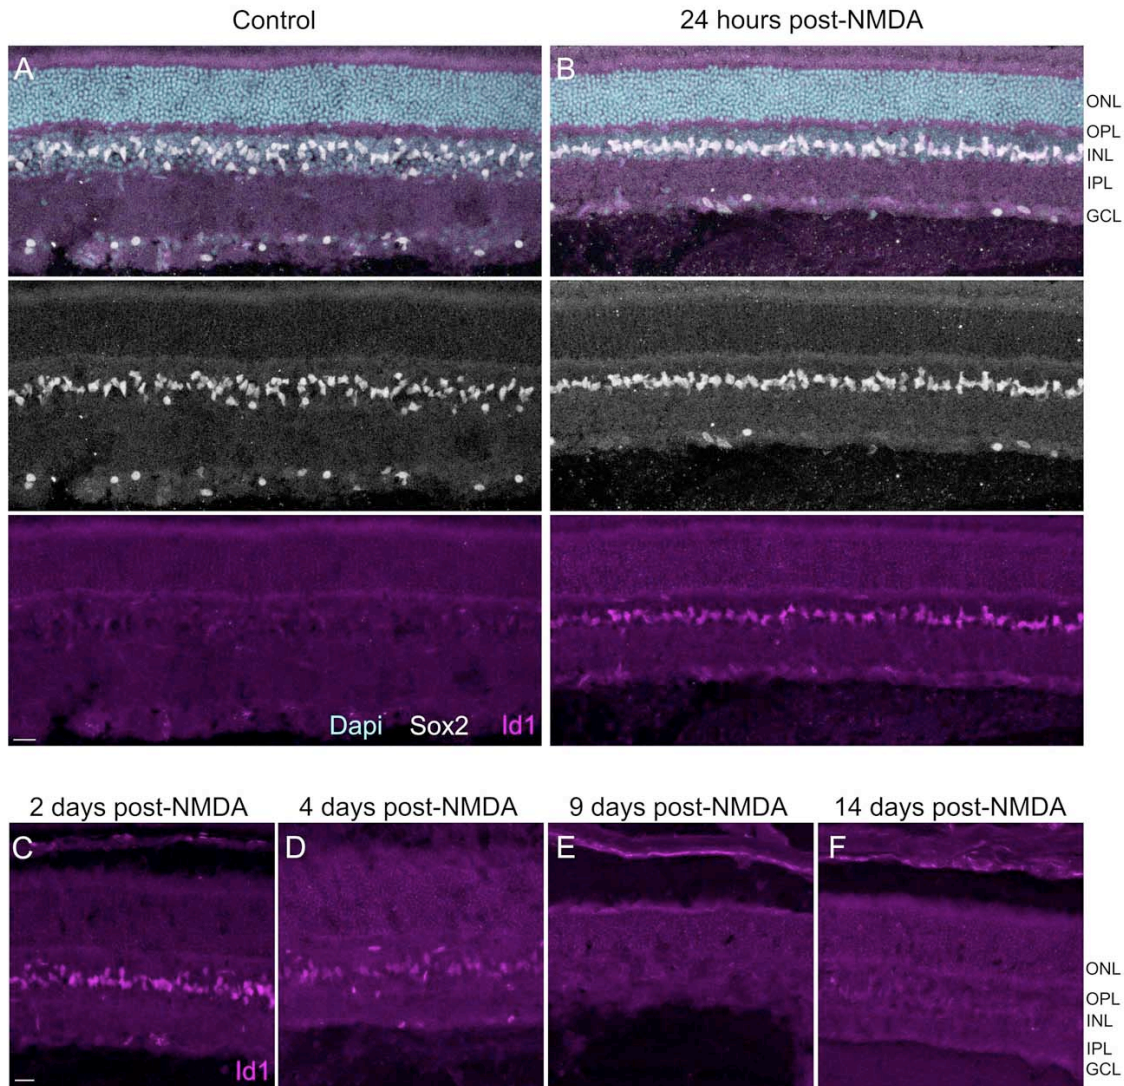

**Figure S4 | Stat pathway is transiently activated during NMDA damage. A)** Example image of WT retina stained for MG (Sox2) and Stat pathway activation (Id1). **B)** WT retina 24 hours after NMDA treatment shows Id1 expression in all MG. **C-F)** Id1 expression begins to decrease at 4 days post-NMDA and is undetectable by 9 days. Scale bars are 20  $\mu$ m.
